# Supplementary material for: Detection and analysis of Lhù'ààn Mân' (Kluane Lake) dust plumes using passive and active ground-based remote sensing supported by physical surface measurements
Source: Copernicus journal article supplement (doi:10.5194/amt-16-4115-2023), 2023-09-12

## S6 Daily Lidar profiles during May, 2019

Daily  $\beta_{c,\sim}(z)$  profiles as a function of time.  $\beta_{c,\sim}(z)$  is defined in Eq. (2) of the main text (for simplicity we write  $\beta_c(z)$  as the ordinate of the profiles in this supplementary material file). The gray background color of the profiles represents NAN (see the caption of Fig. 2 for details). The continuous curves (whose scale appears on the right of the profiles) are derived CM optical depths ( $\tau_c$ ,  $\tau_{dust}^\ell$ , and  $\tau_{cloud}^\ell$ ) as defined in the main text. Periods of interest (POI {day in May}{sequence number on that day} along with their subclassification are shown between the dashed vertical lines that define their temporal extent). The black coloring shows the DLH (the high frequency outputs of the DLH process). The bottom profile is a 0 to 2 km zoom of the top profile (where  $\beta_c(z)$  values above the DLH are excluded). Details on the native temporal resolution (11 seconds) of the Doppler lidar and bin-averaging resolution of the lidar profiles (matched to the AERONET temporal resolution and sampling frequency) can be found in Appendix A3 of the main text.

# $\beta_c$ - KLRS 01/02-May-2019

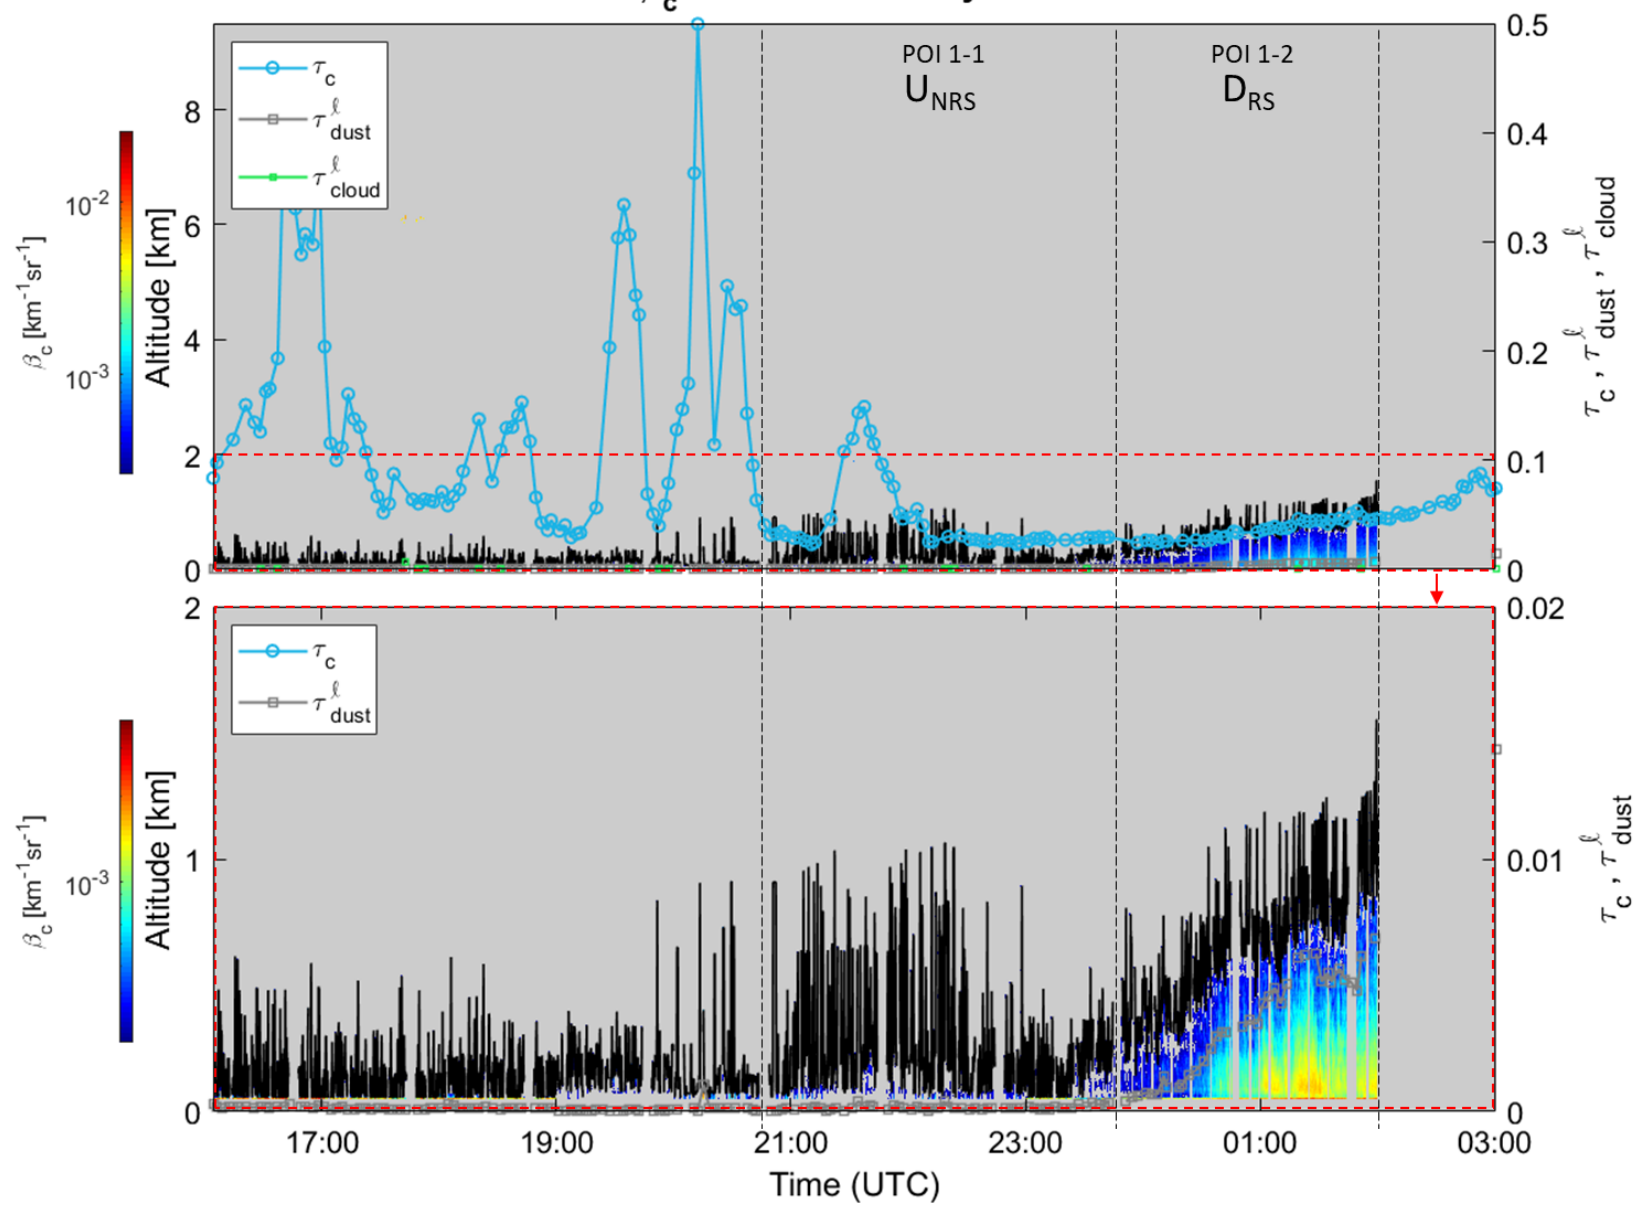

$\beta_c$  - KLRS 06-May-2019 [late afternoon at local time on May 05]

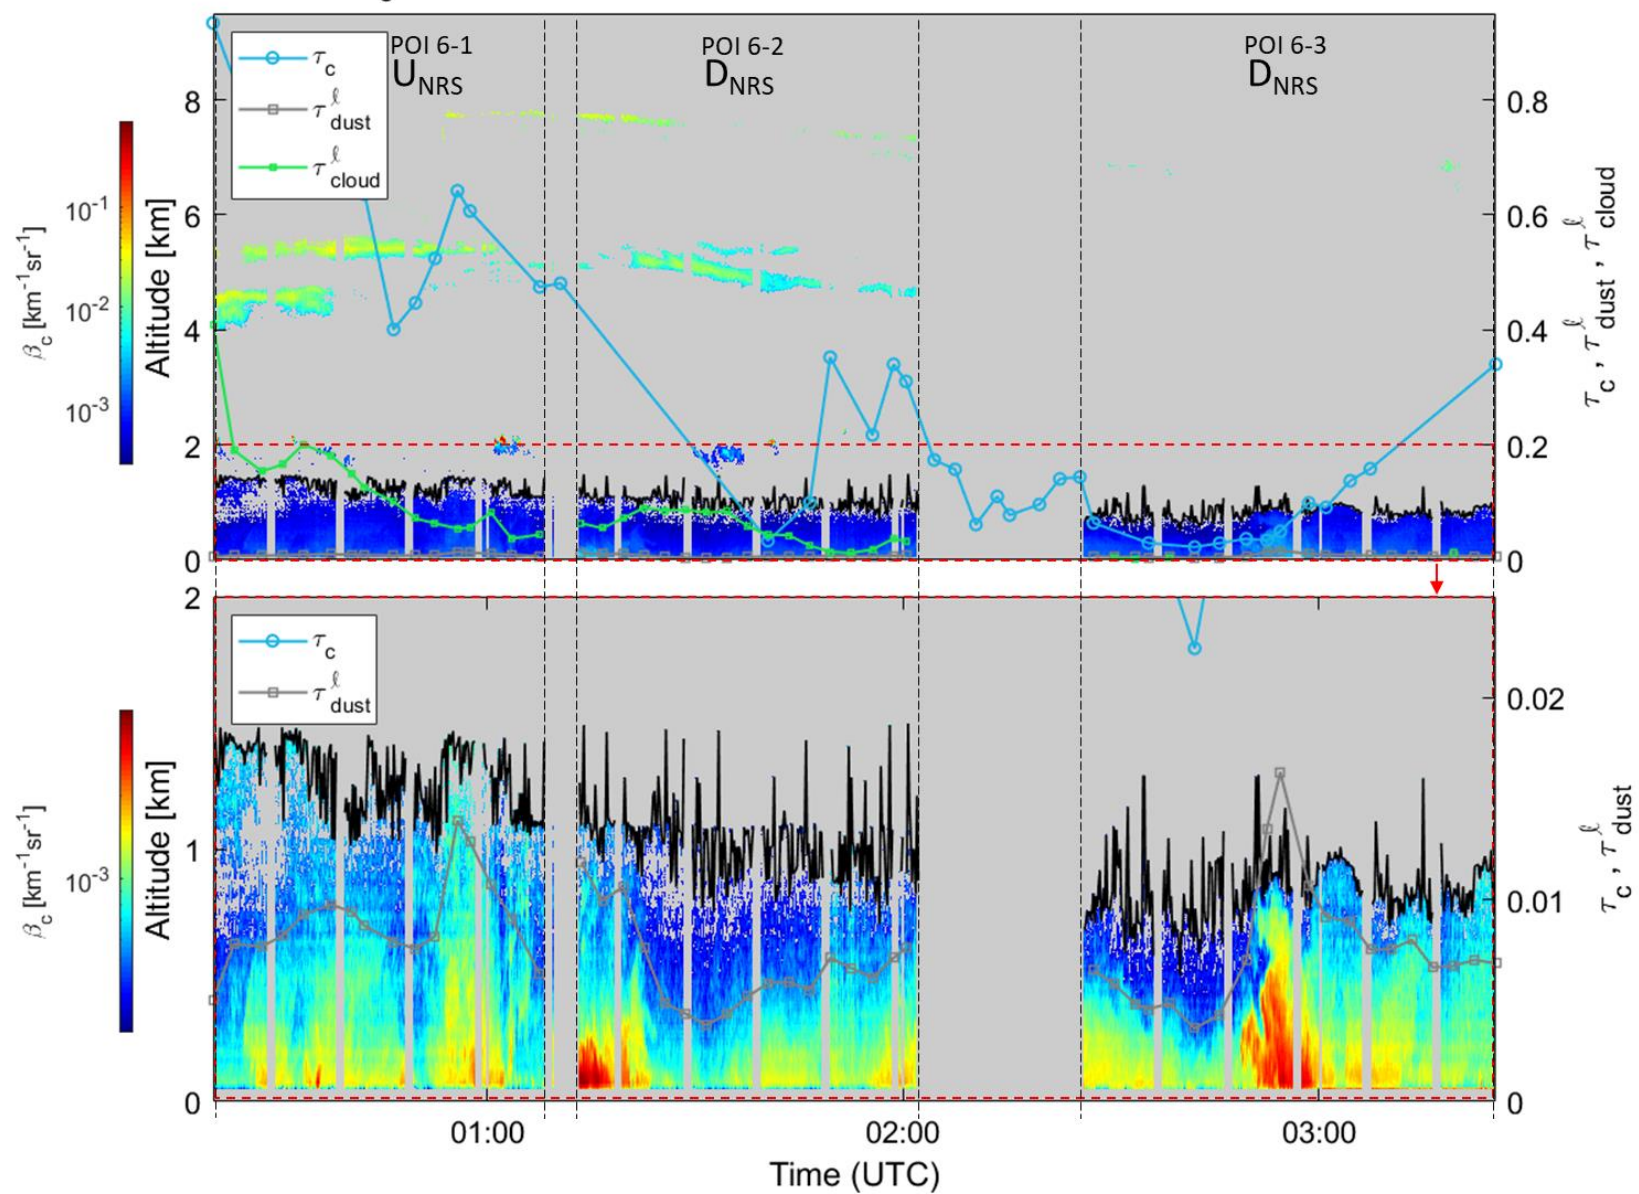

# $\beta_c$ - KLRS 06-May-2019

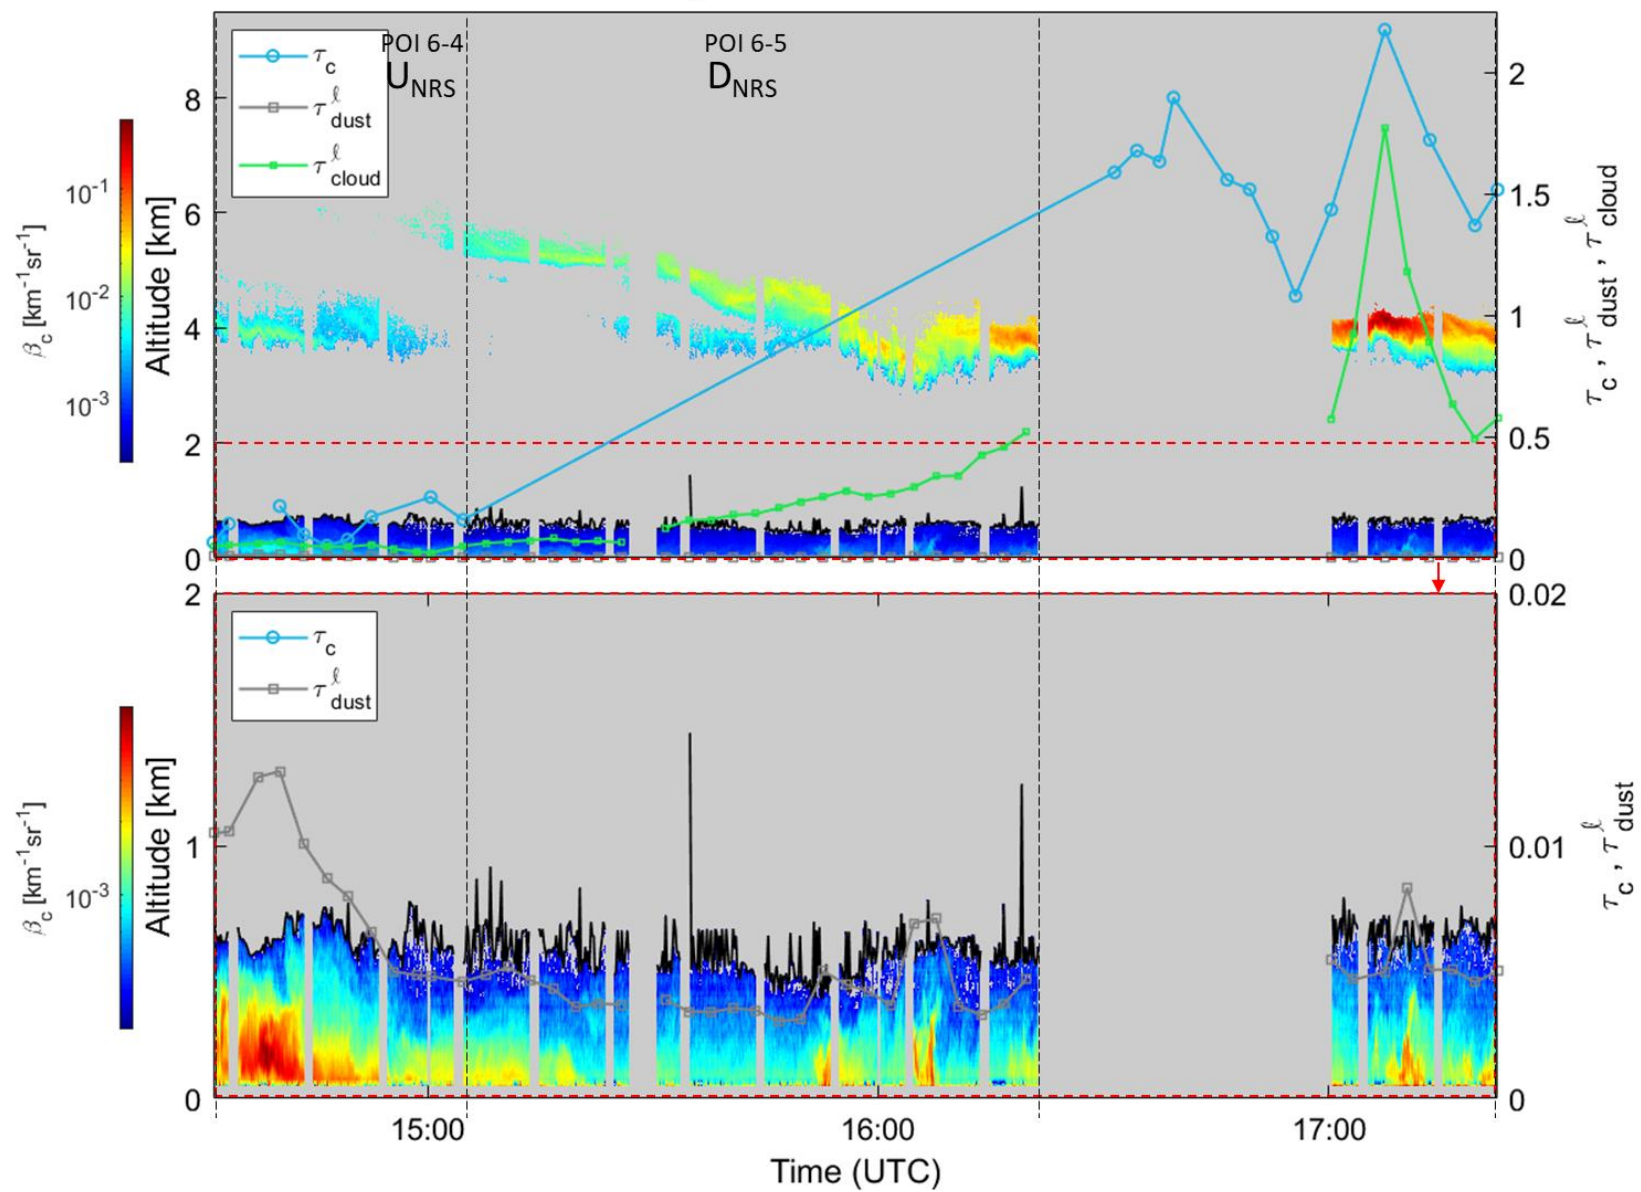

# $\beta_c$ - KLRs 07/08-May-2019

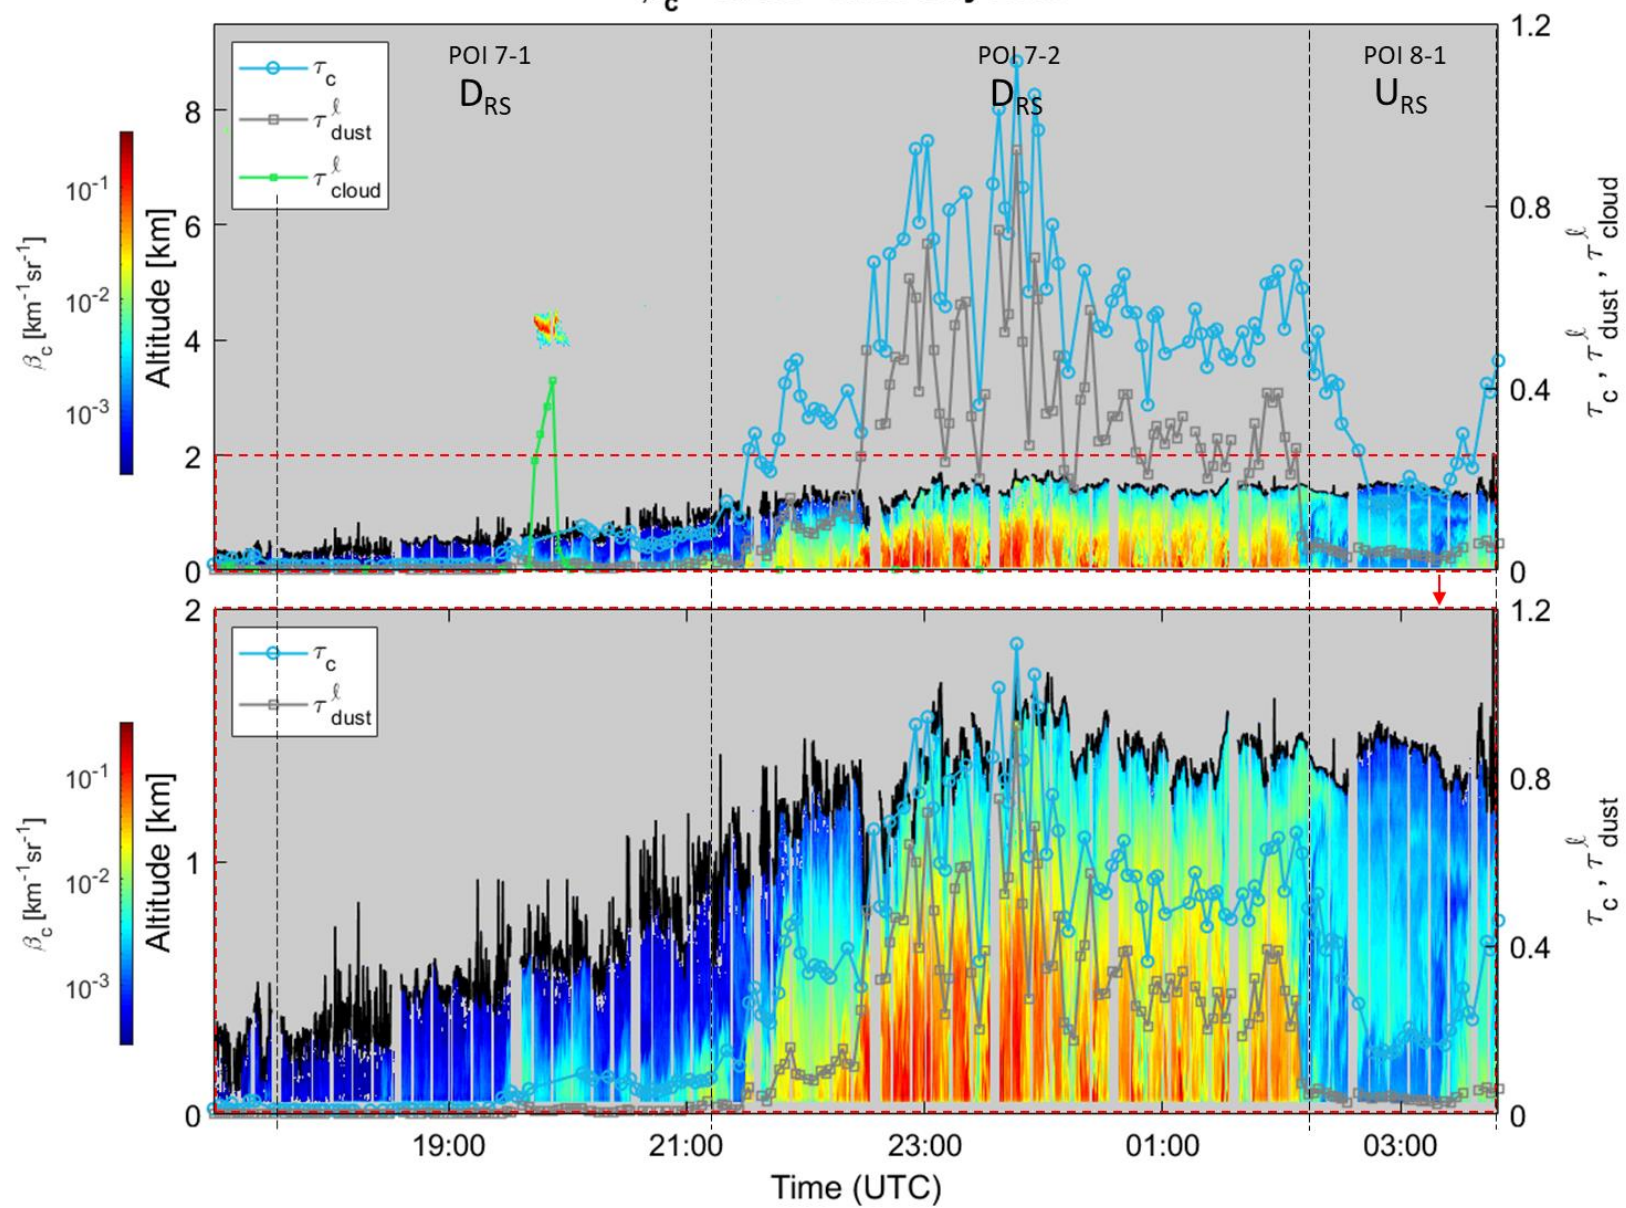

# $\beta_c$ - KLRS 08/09-May-2019

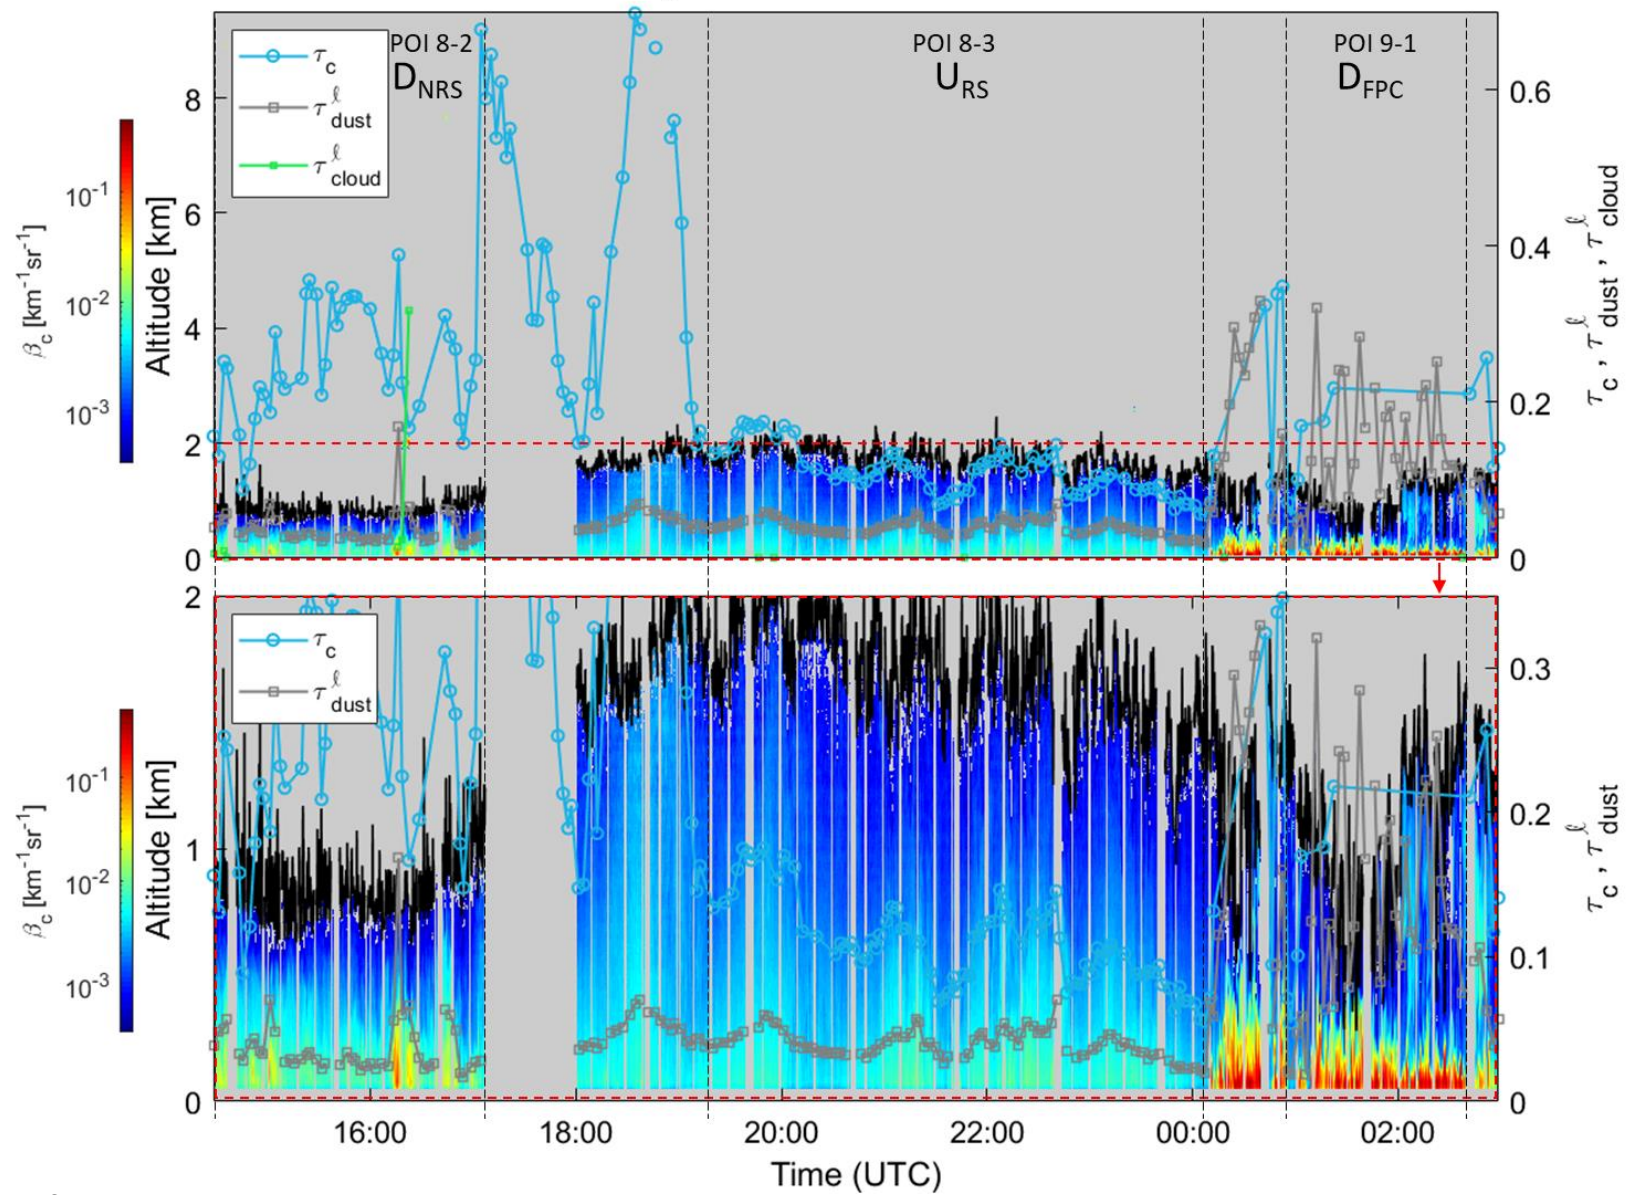

# $\beta_c$ - KLRS 09/10-May-2019

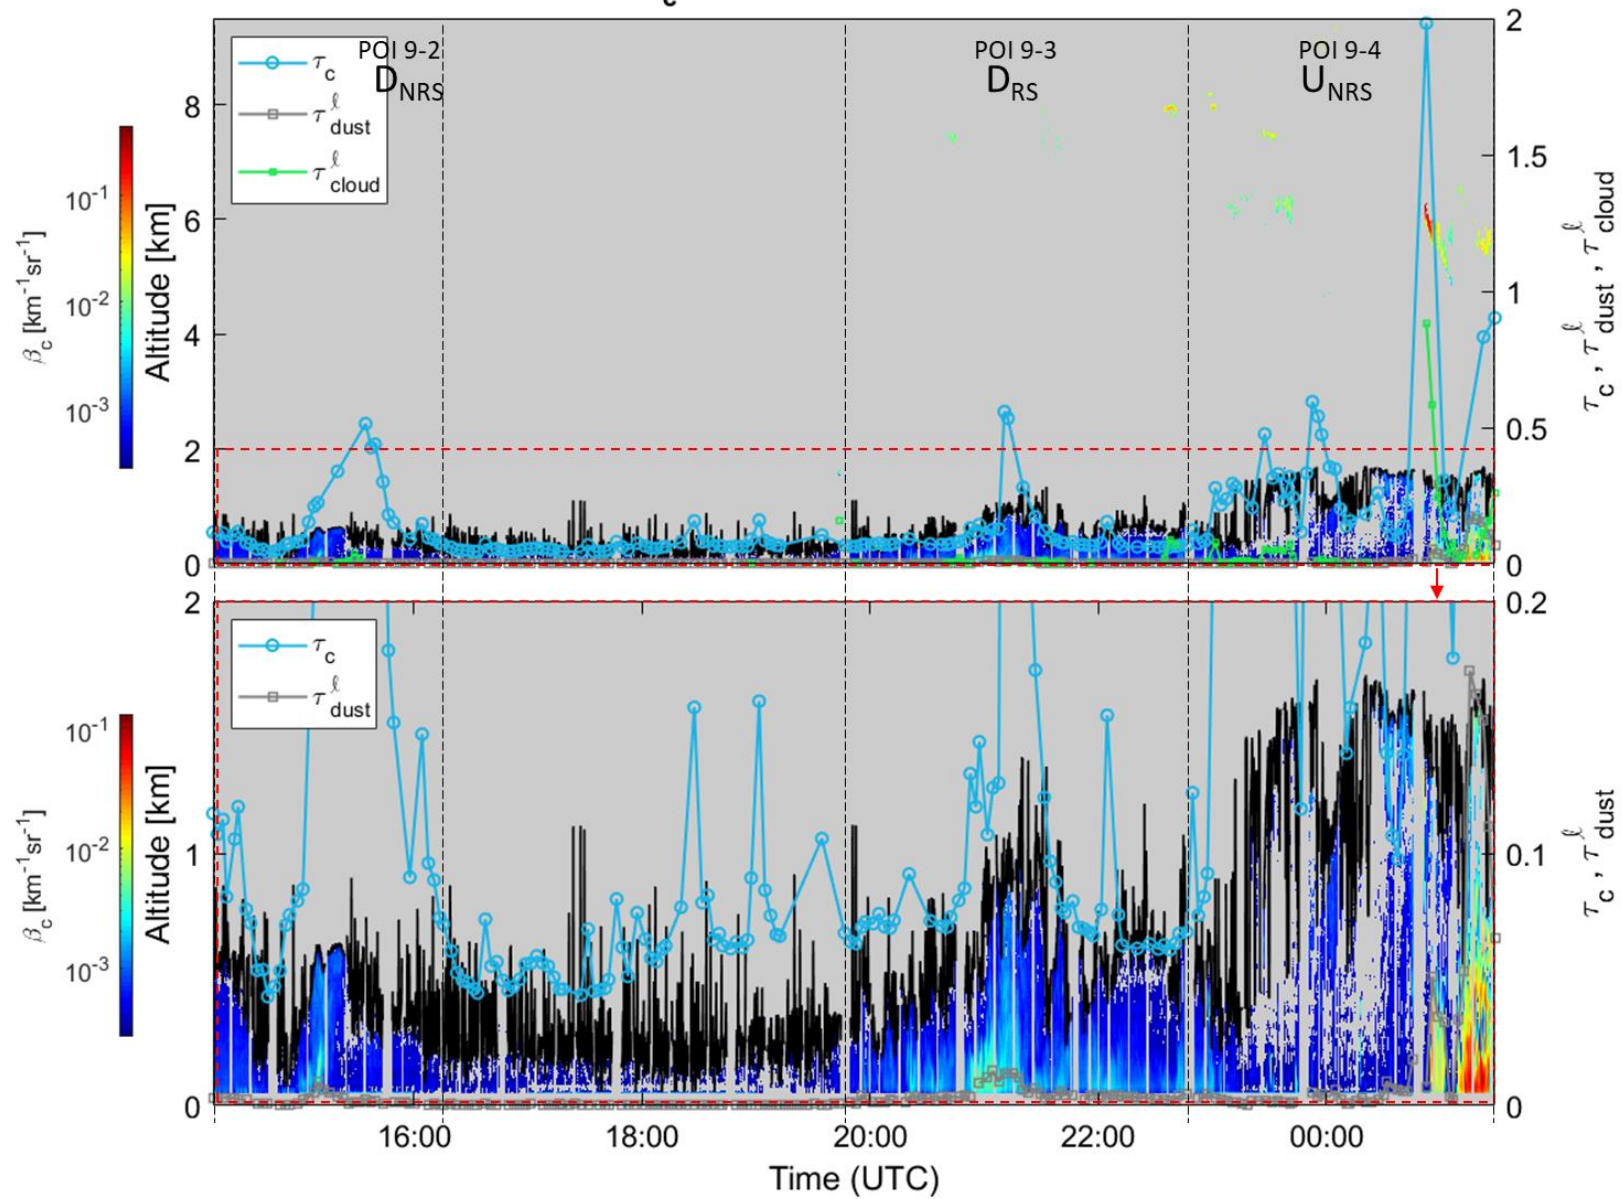

$\beta_c$  - KLRS 16-May-2019 [late afternoon at local time on May 15]

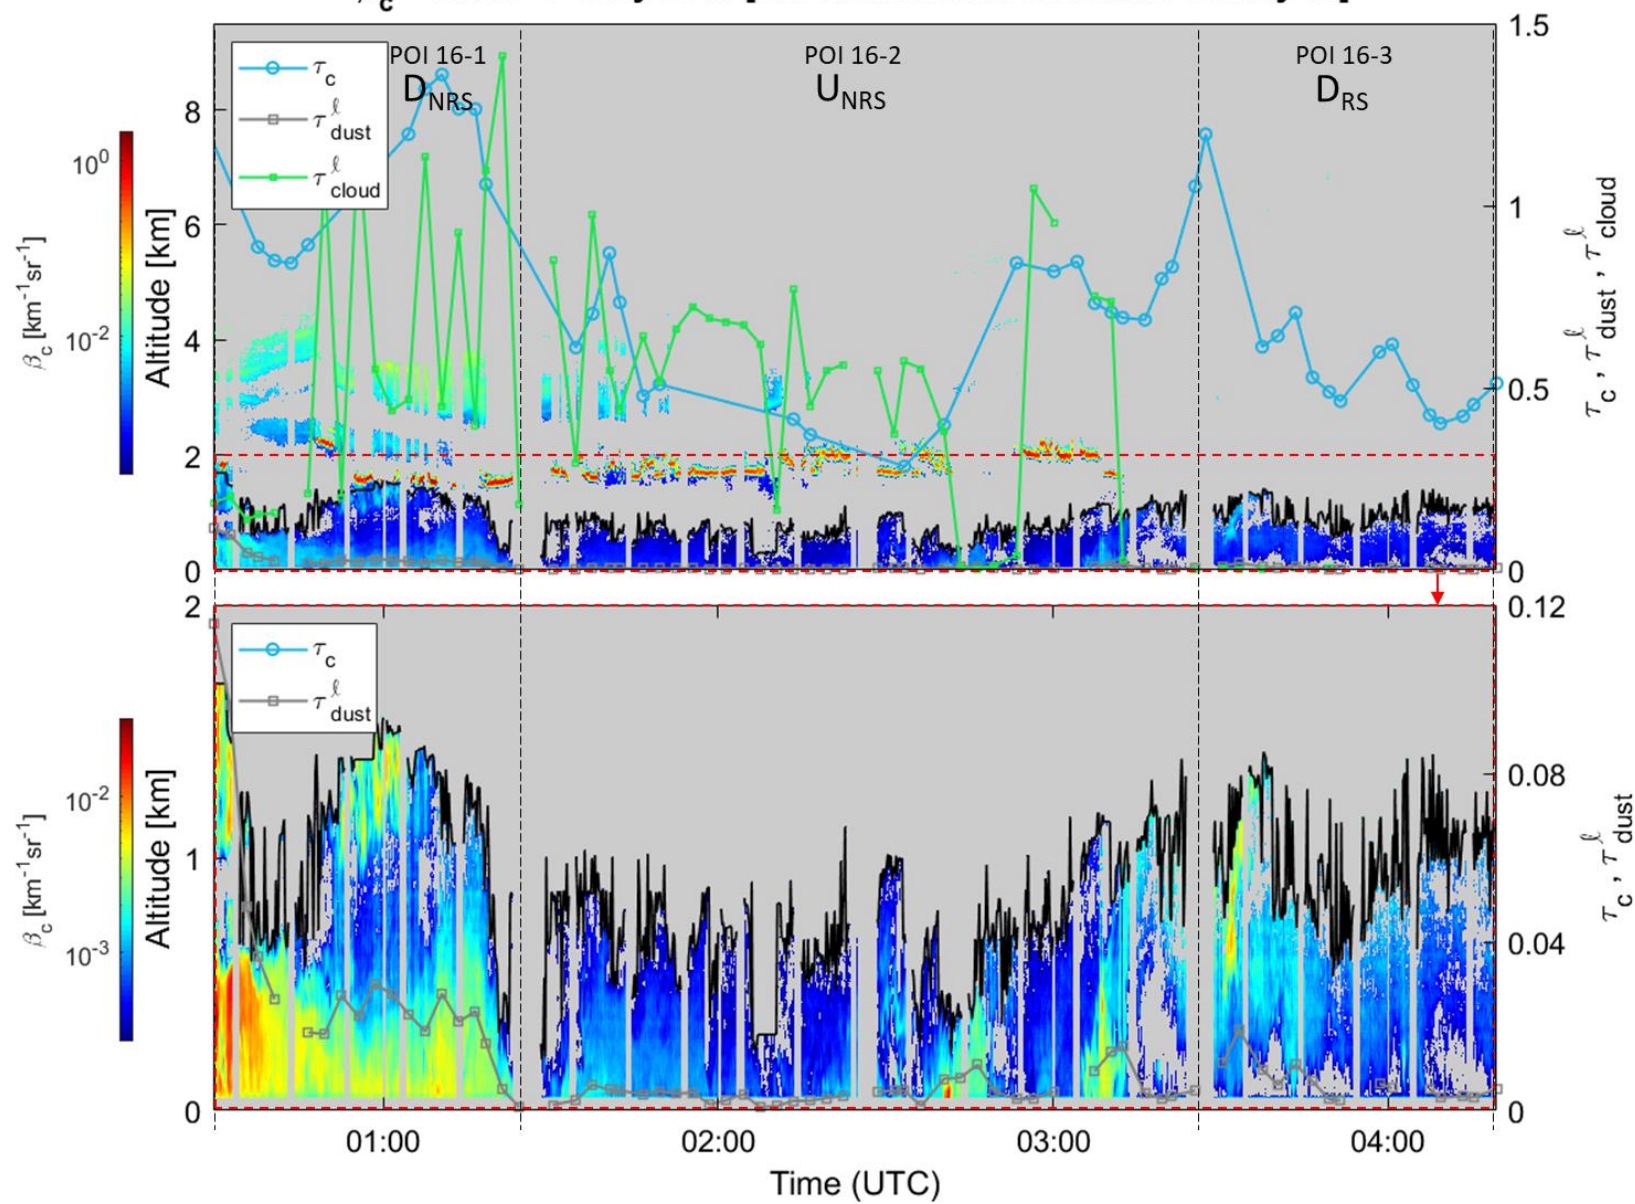

# $\beta_c$ - KLRS 16/17-May-2019

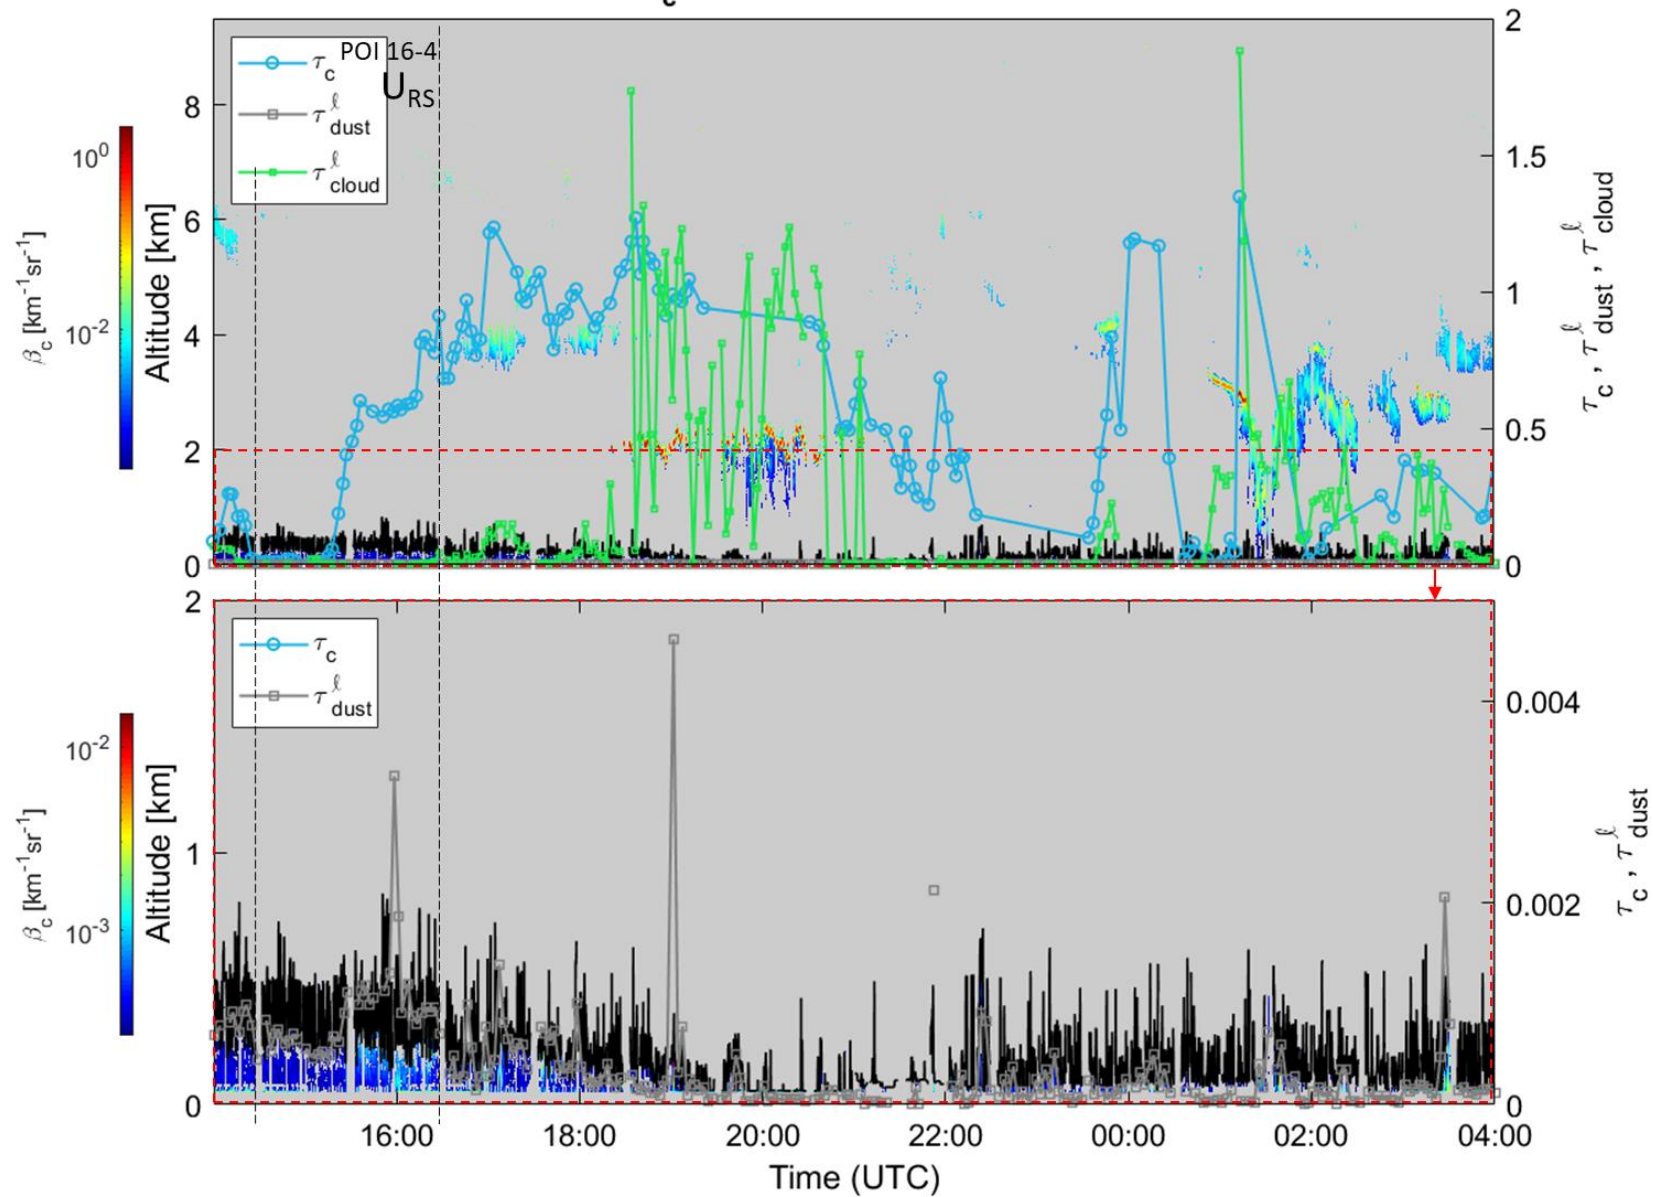

$\beta_c$  - KLRS 17/18-May-2019 [late afternoon at local time on May 17]

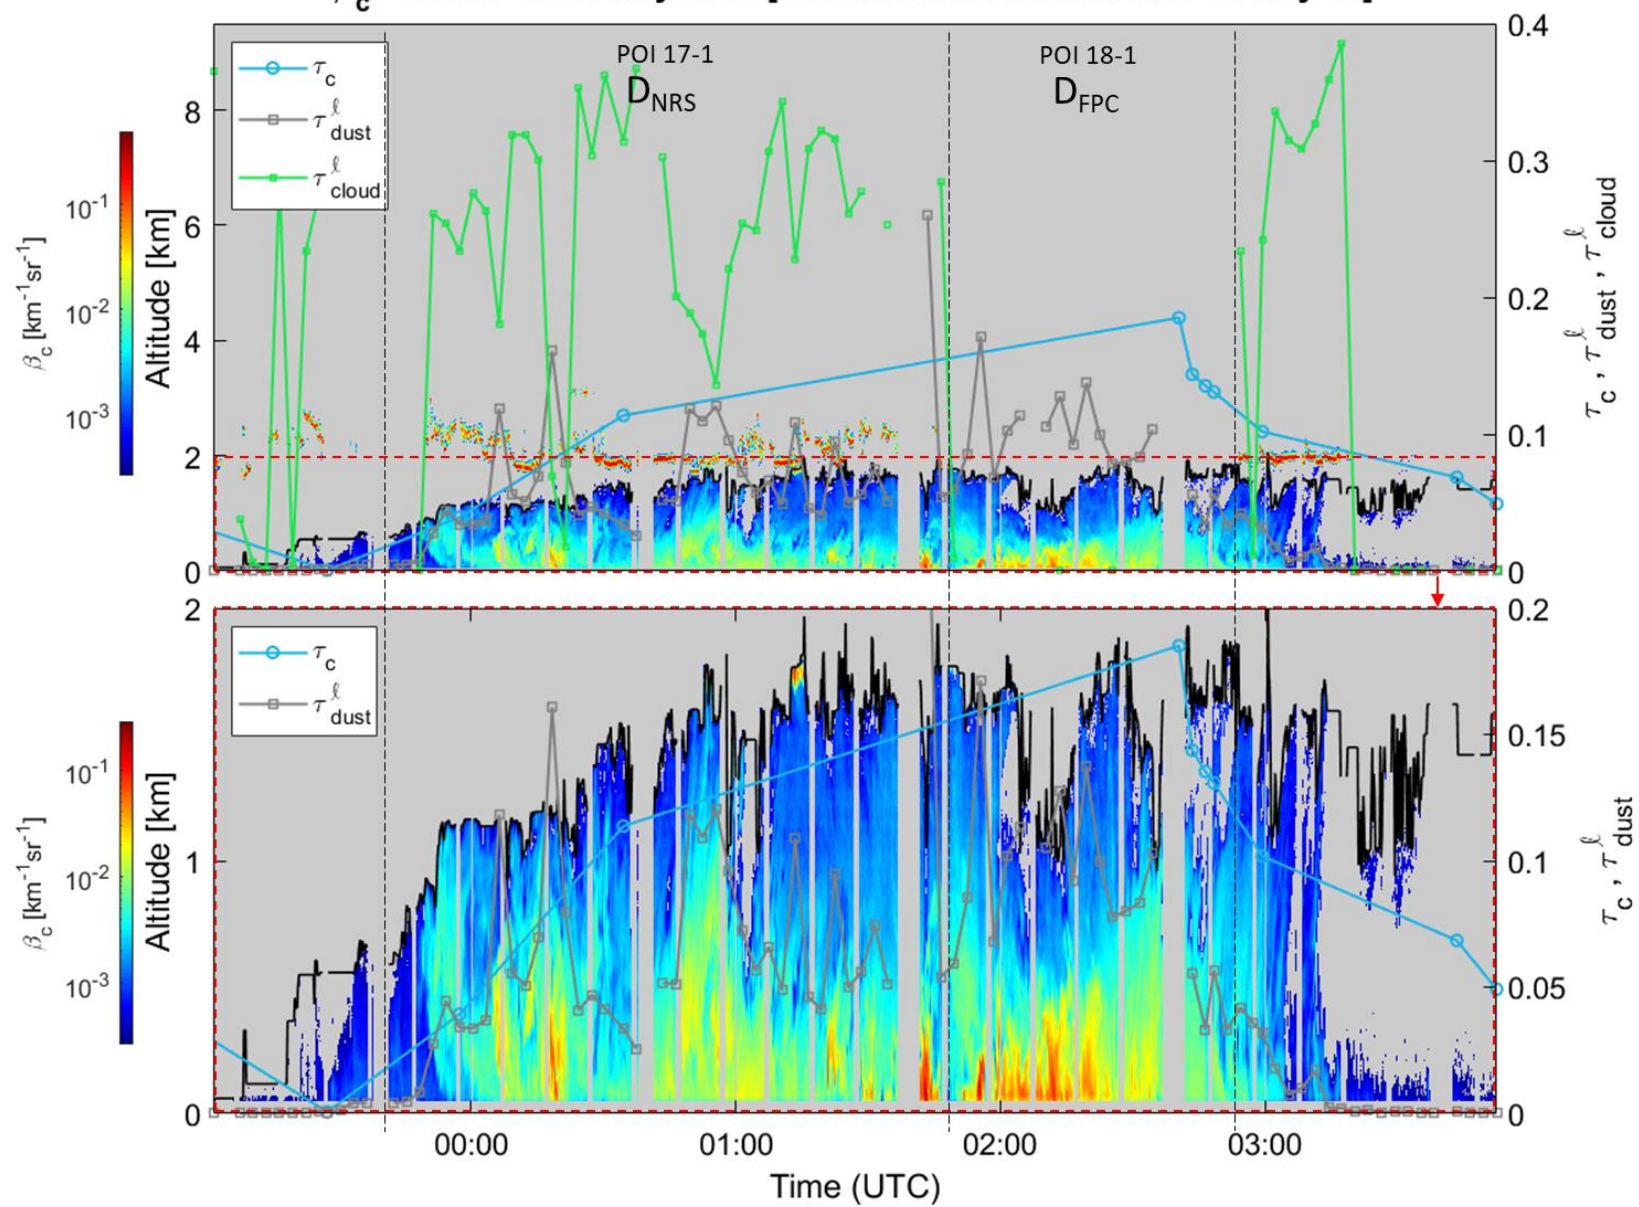

# $\beta_c$ - KLRS 18/19-May-2019

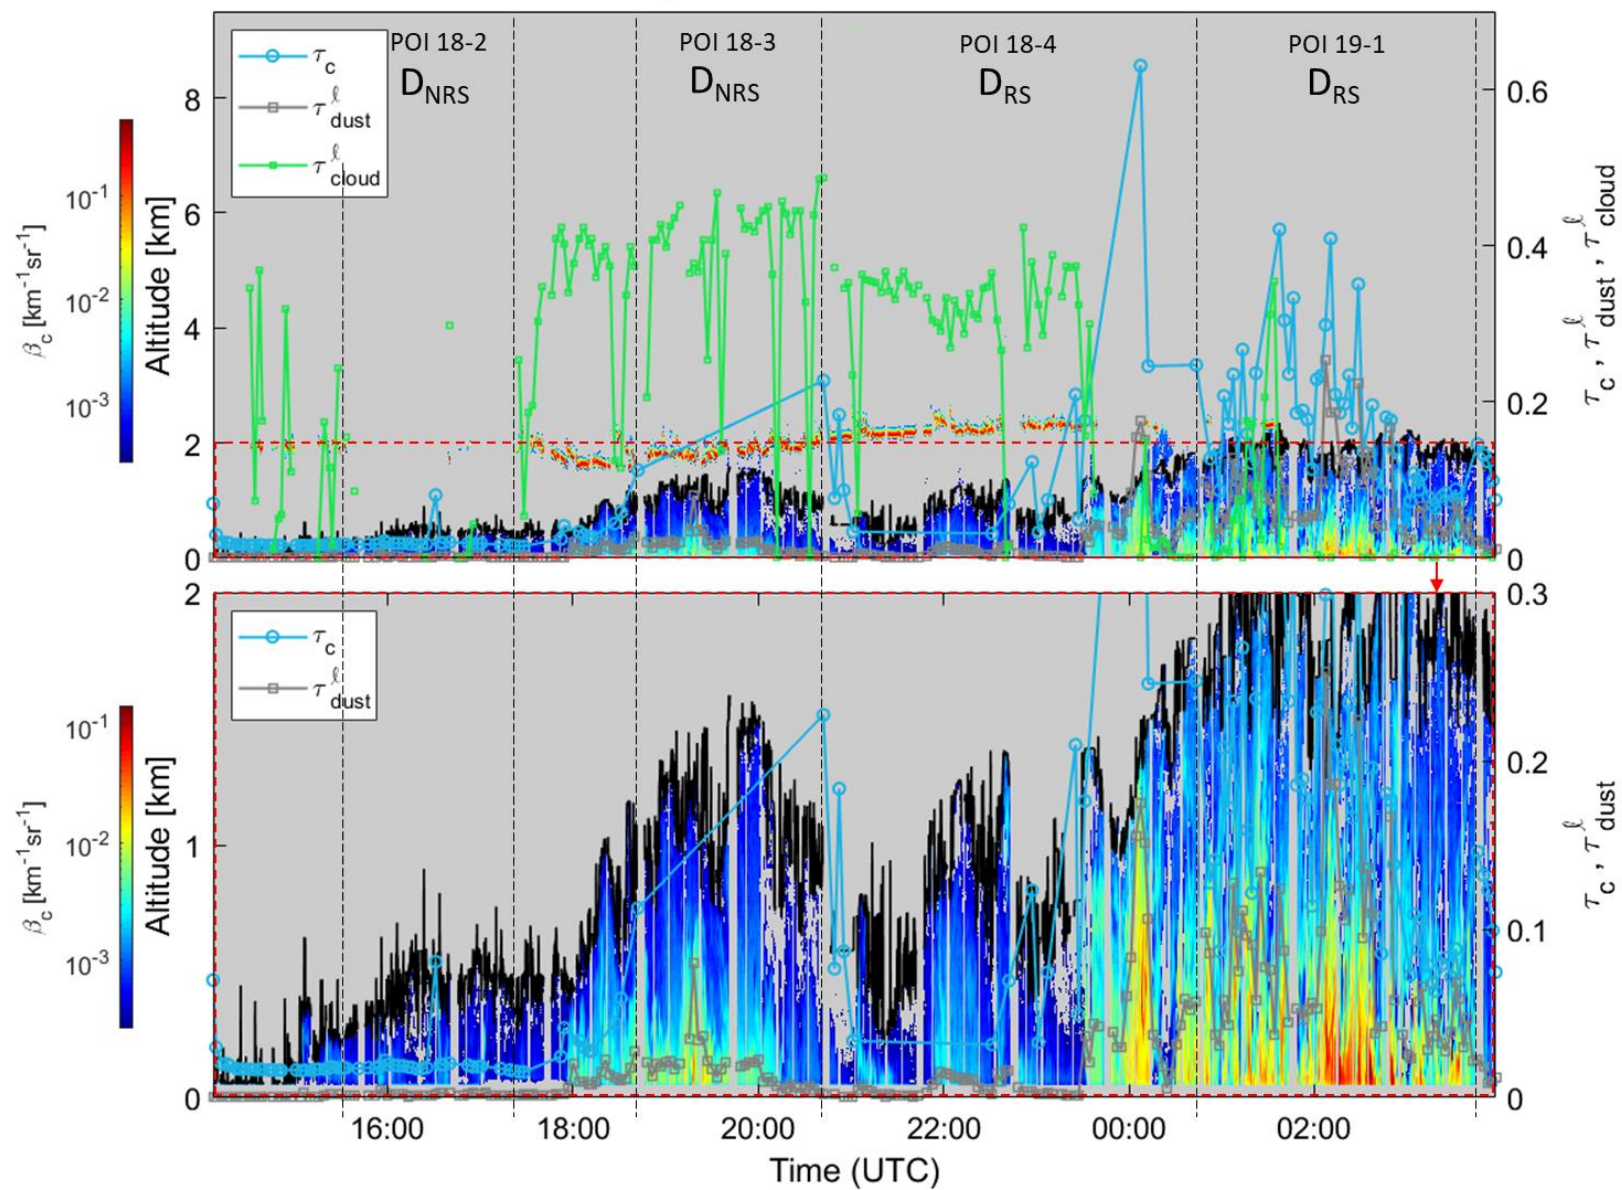

# $\beta_c$ - KLRS 19-May-2019

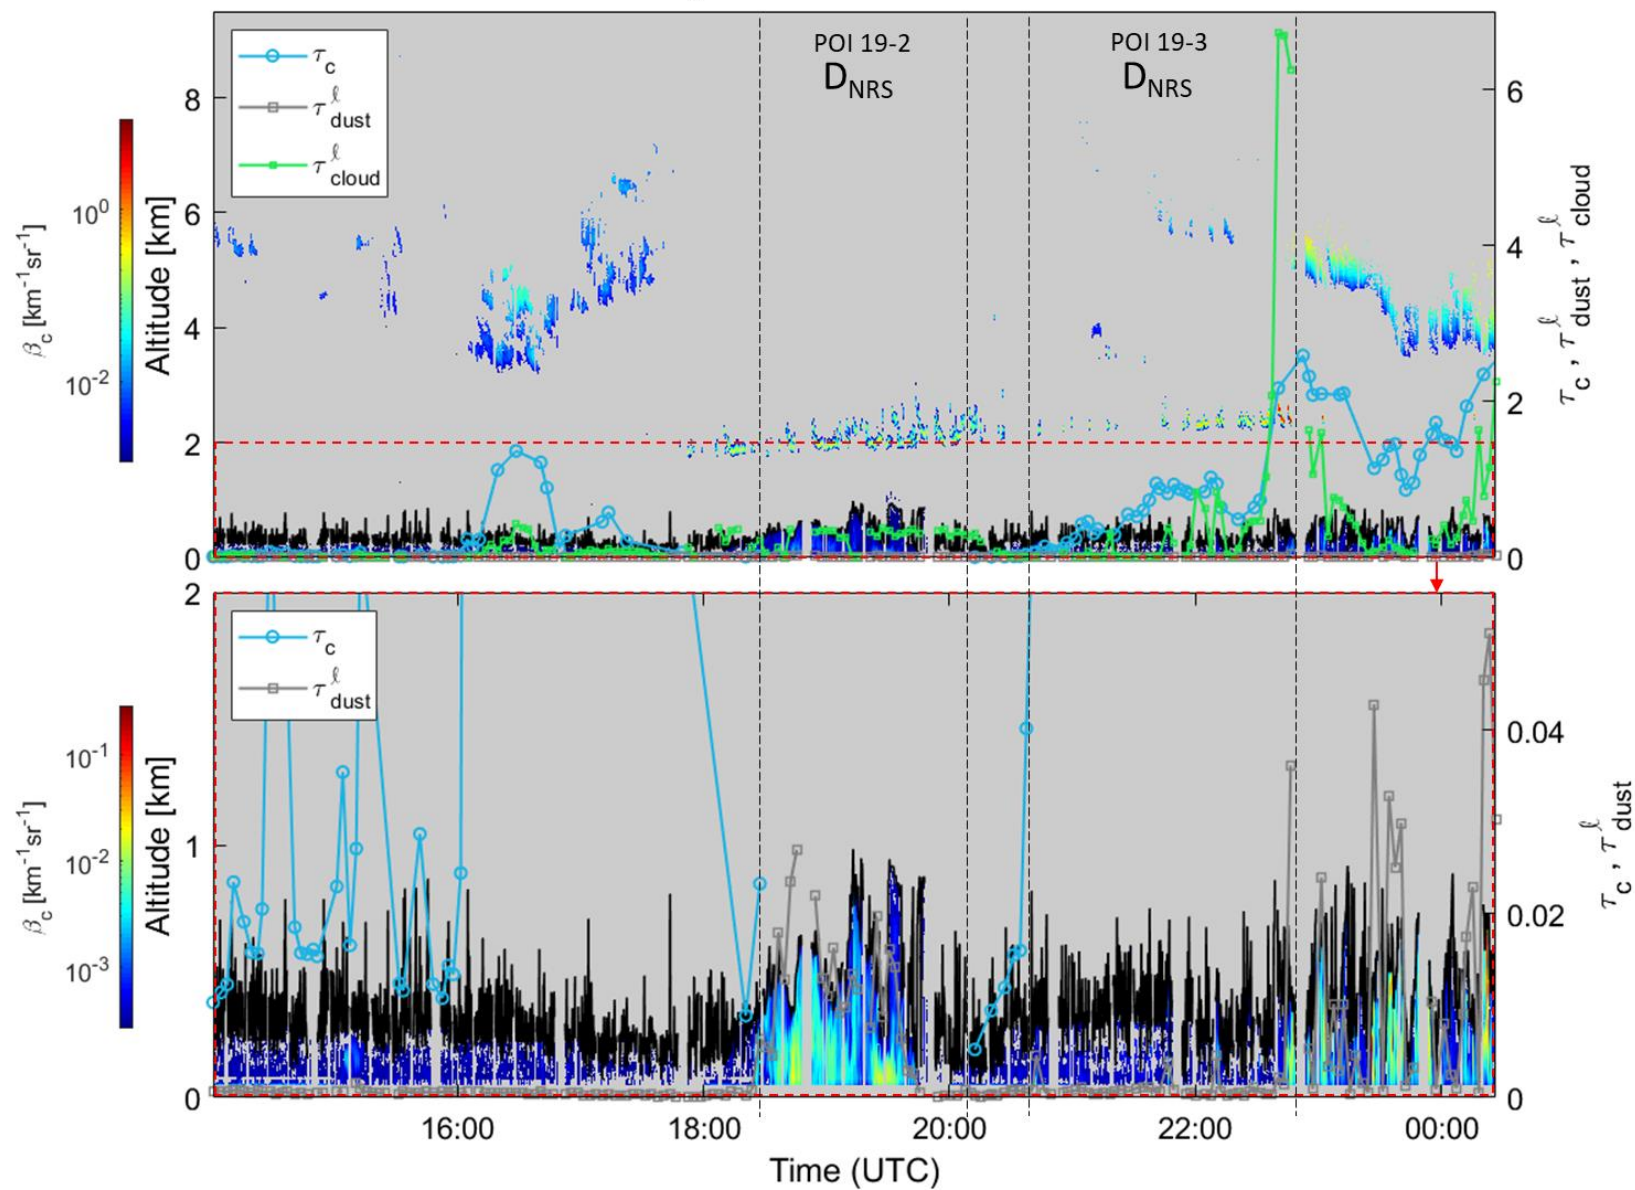

# $\beta_c$ - KLRS 20/21-May-2019

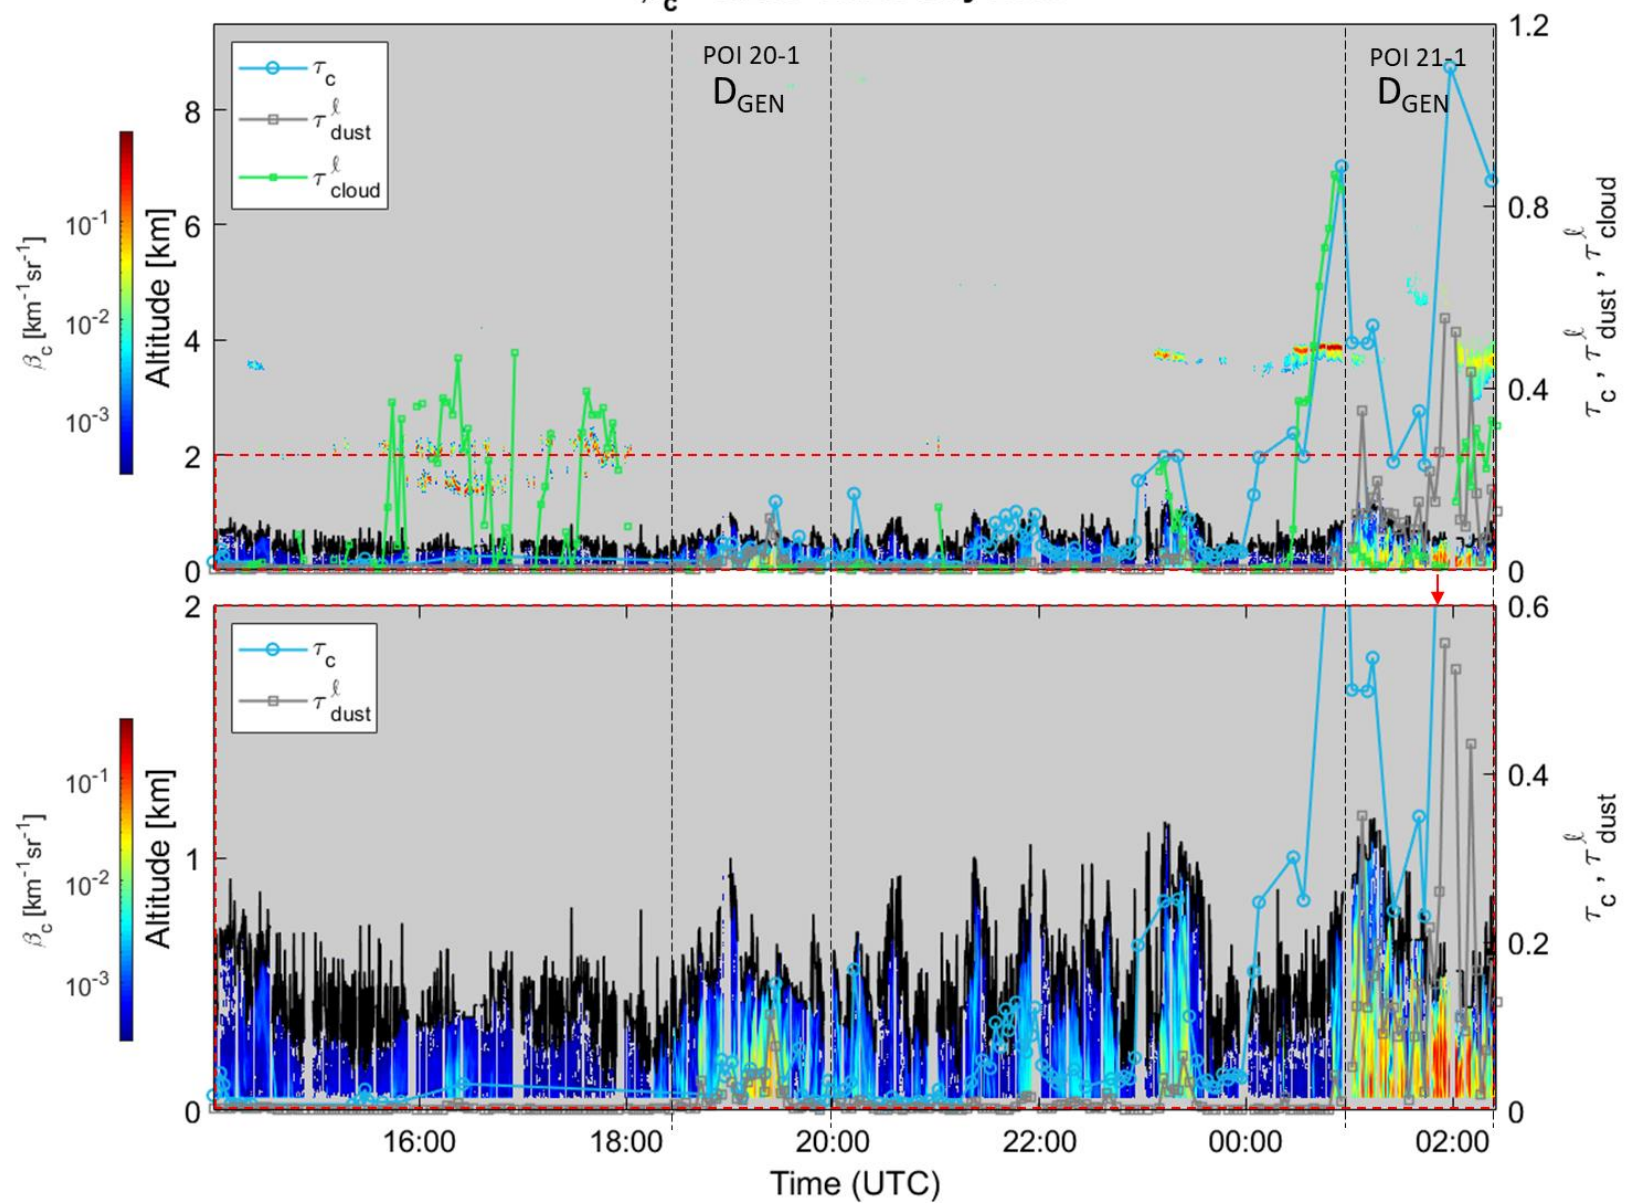

$\beta_c$  - KLRS 22-May-2019 [late afternoon at local time on May 21]

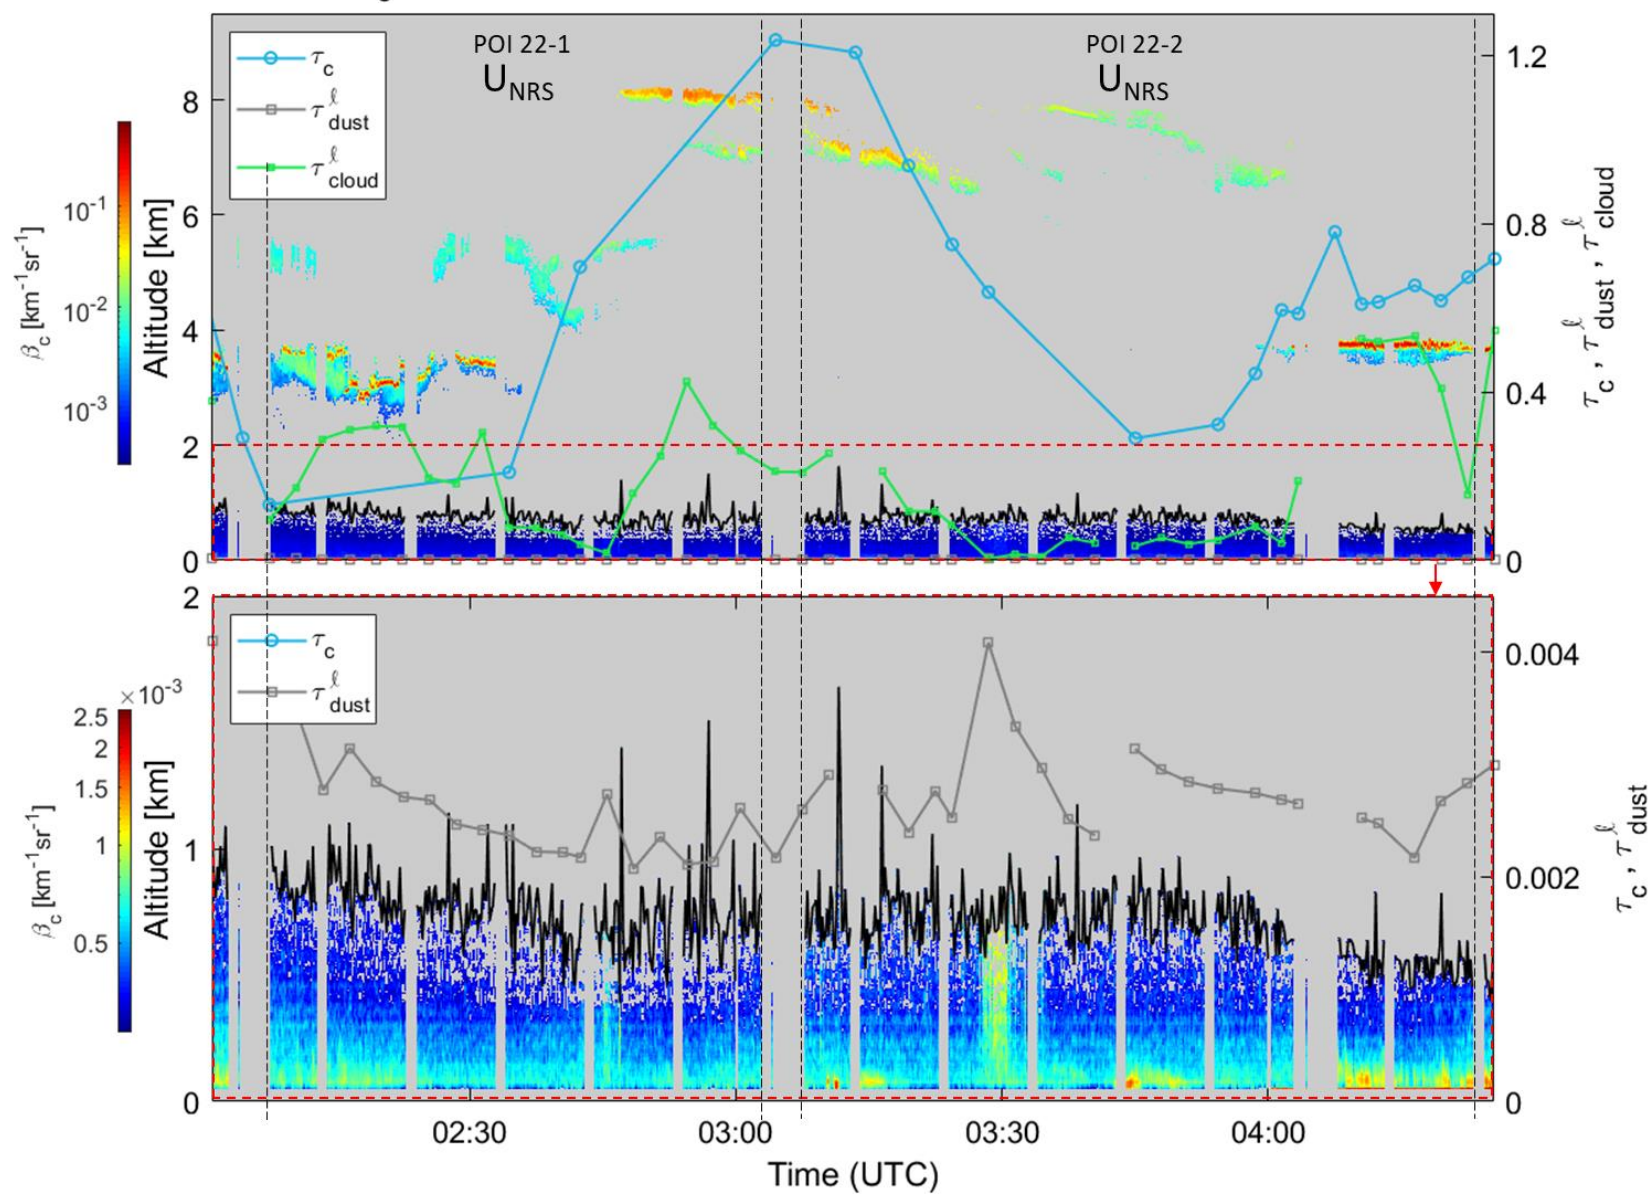

# $\beta_c$ - KLRs 22/23-May-2019

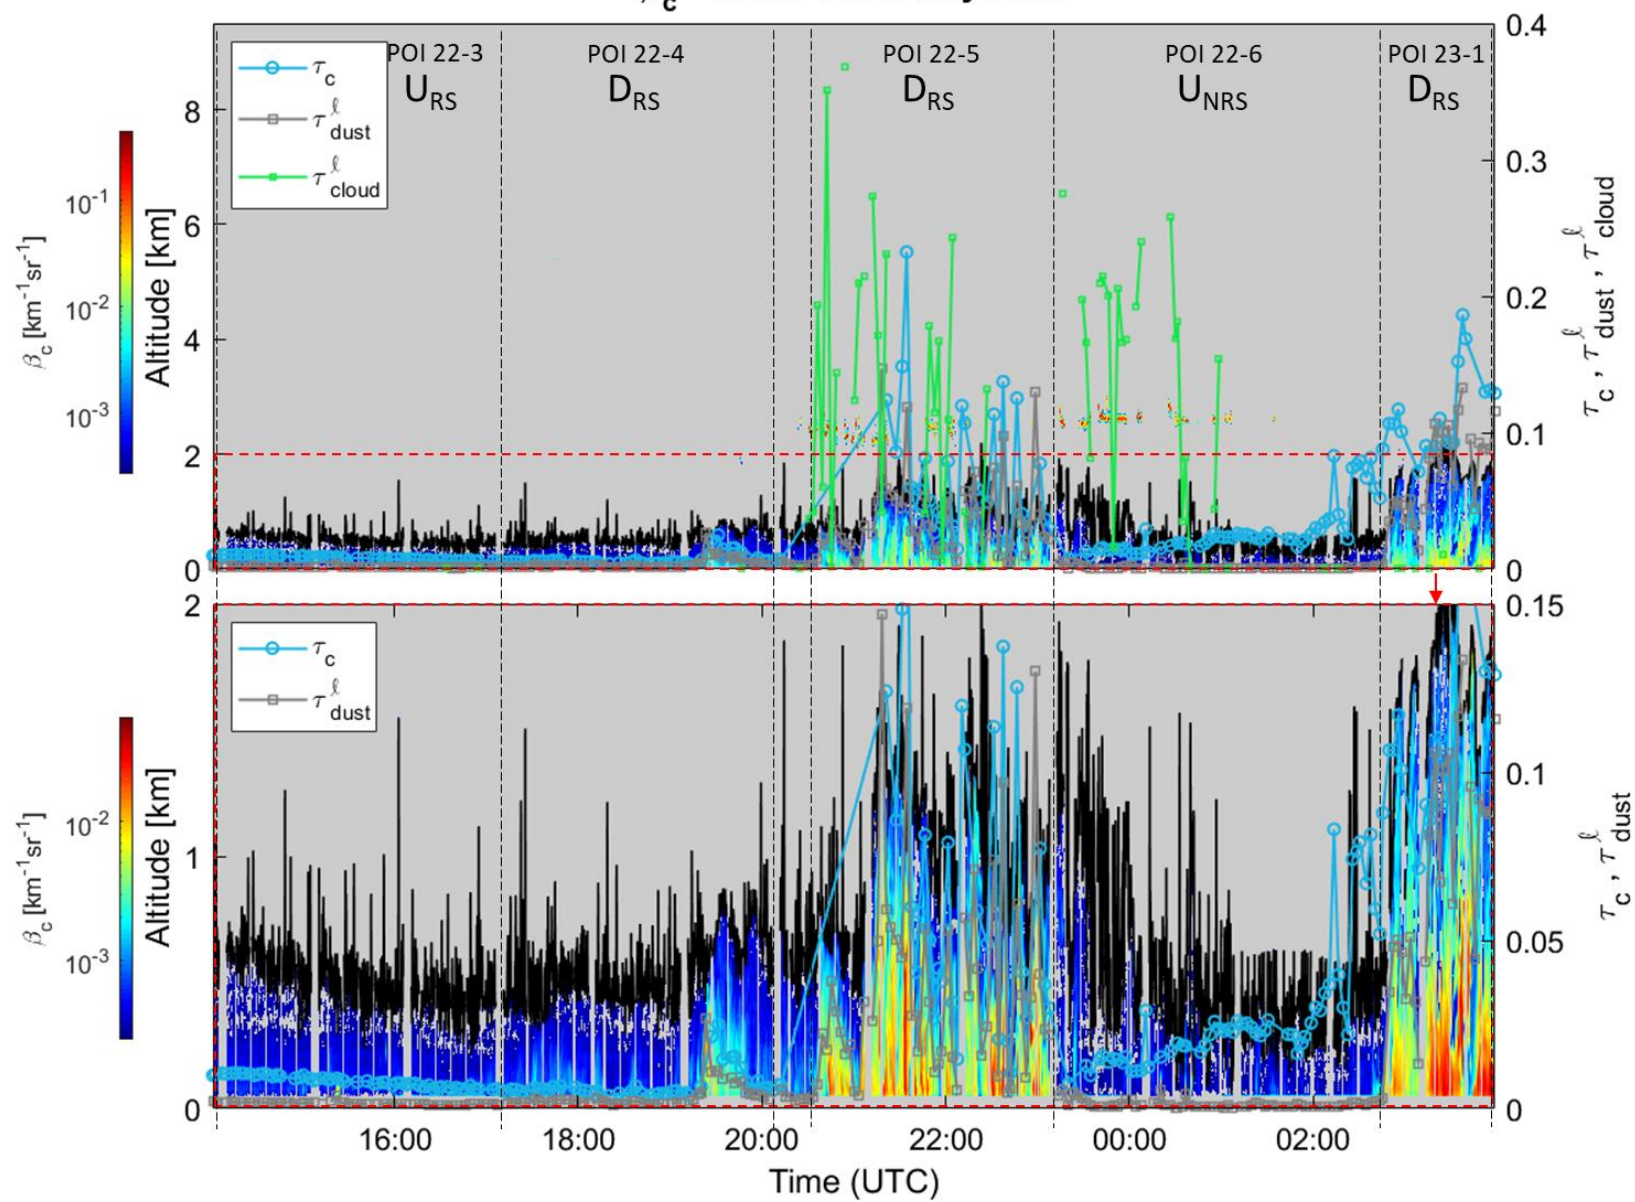

# $\beta_c$ - KLRS 23/24-May-2019

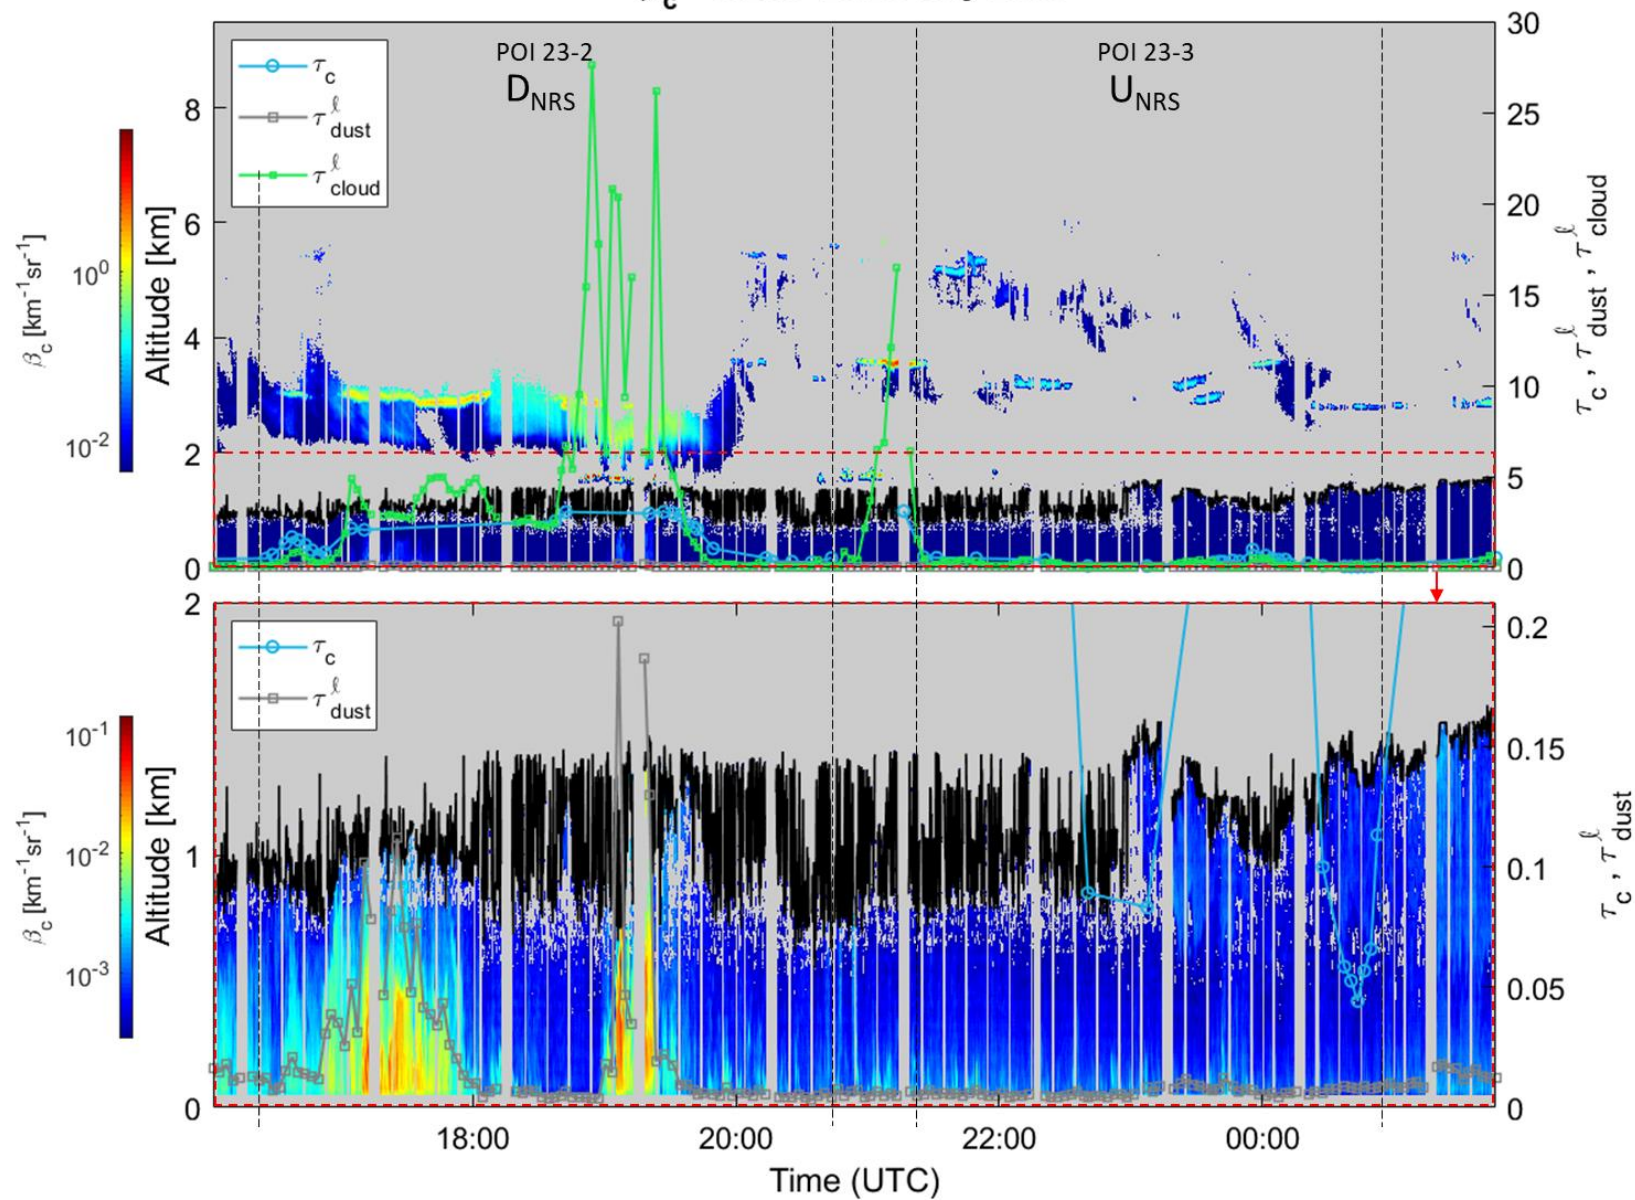

$\beta_c$  - KLRS 24/25-May-2019 [late afternoon at local time on May 24]

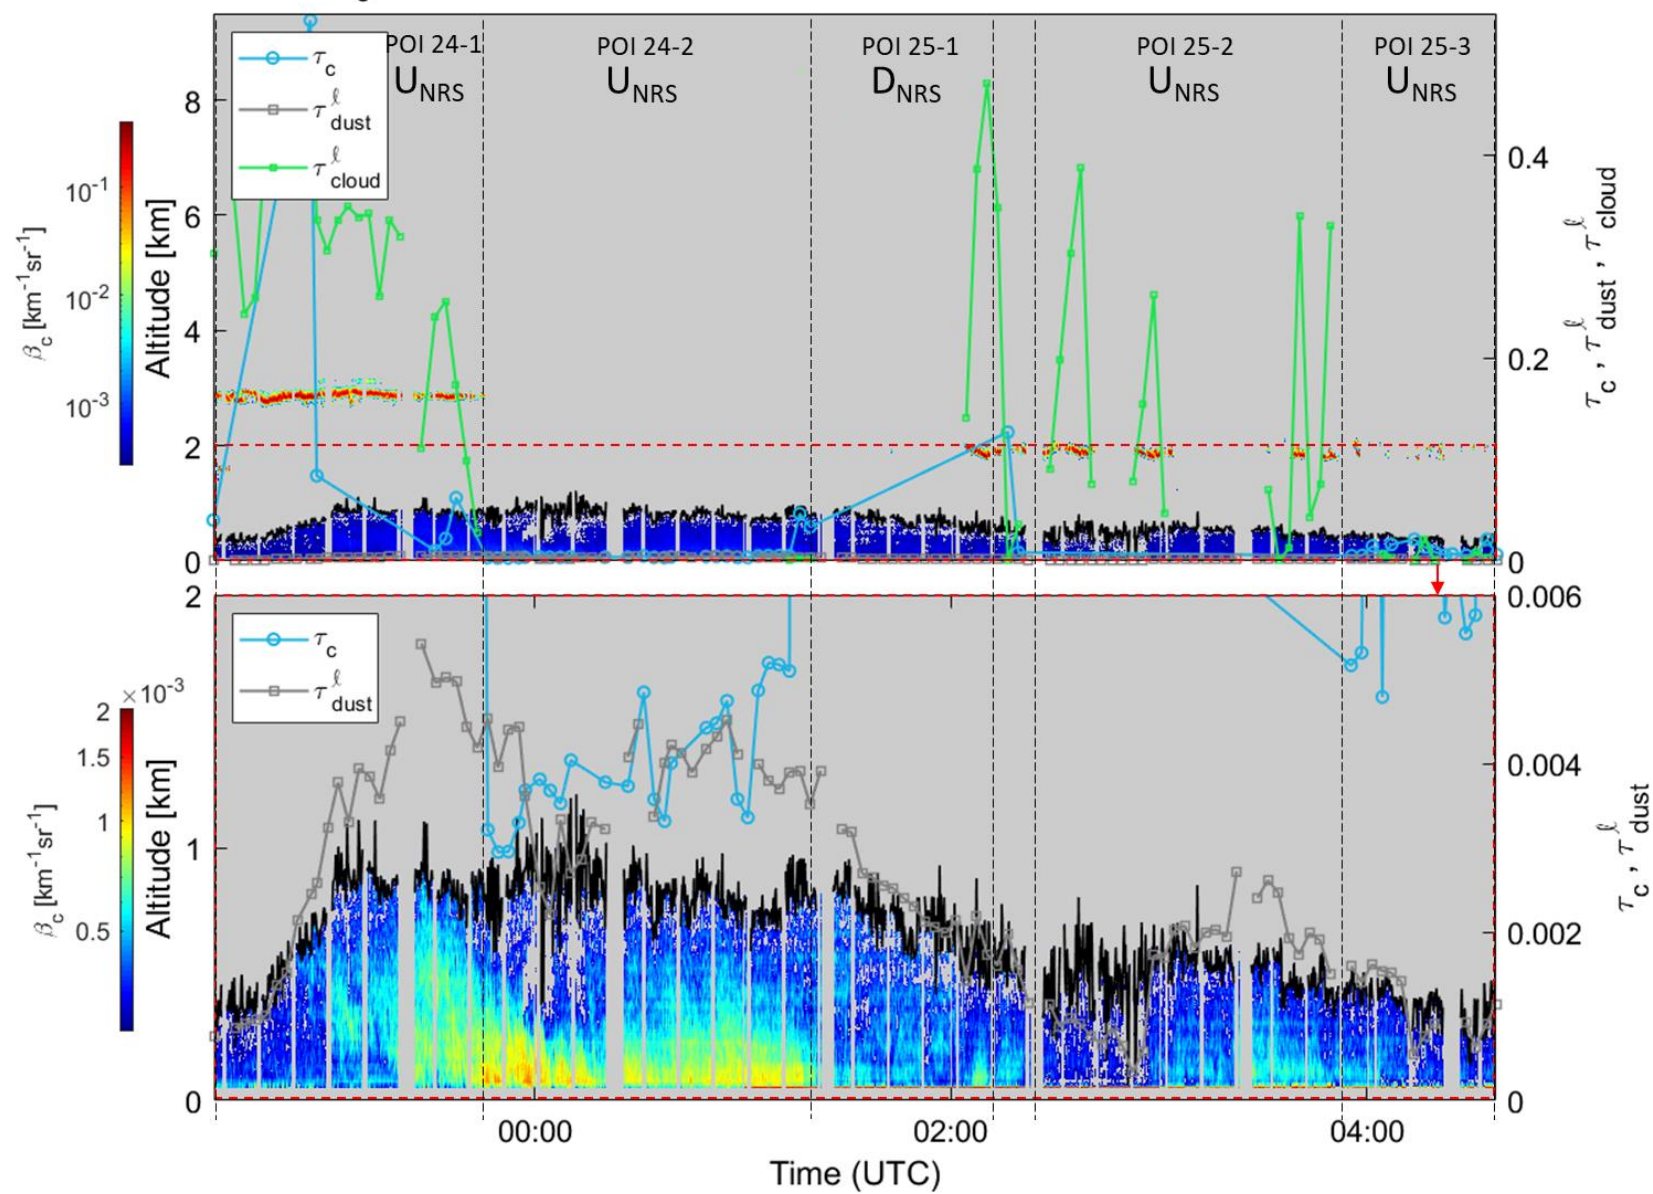

# $\beta_c$ - KLRS 25/26-May-2019

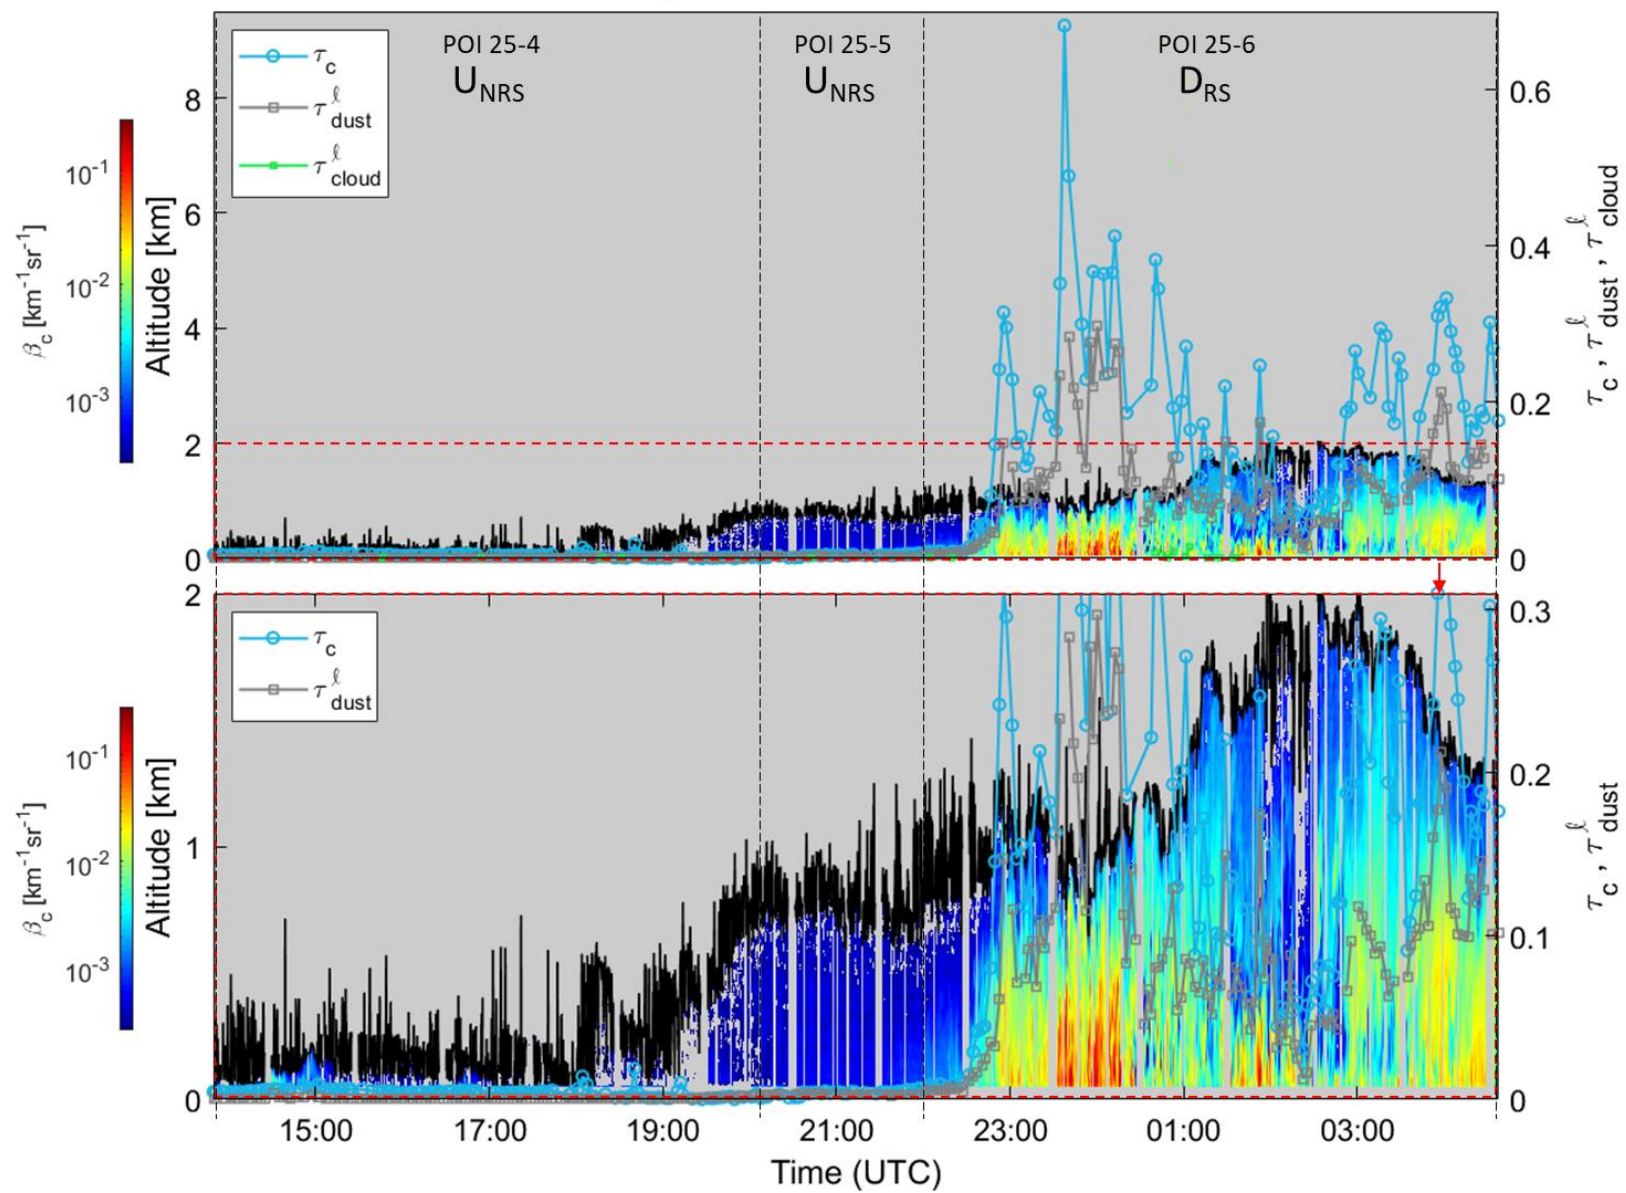

# $\beta_c$ - KLRS 26-May-2019

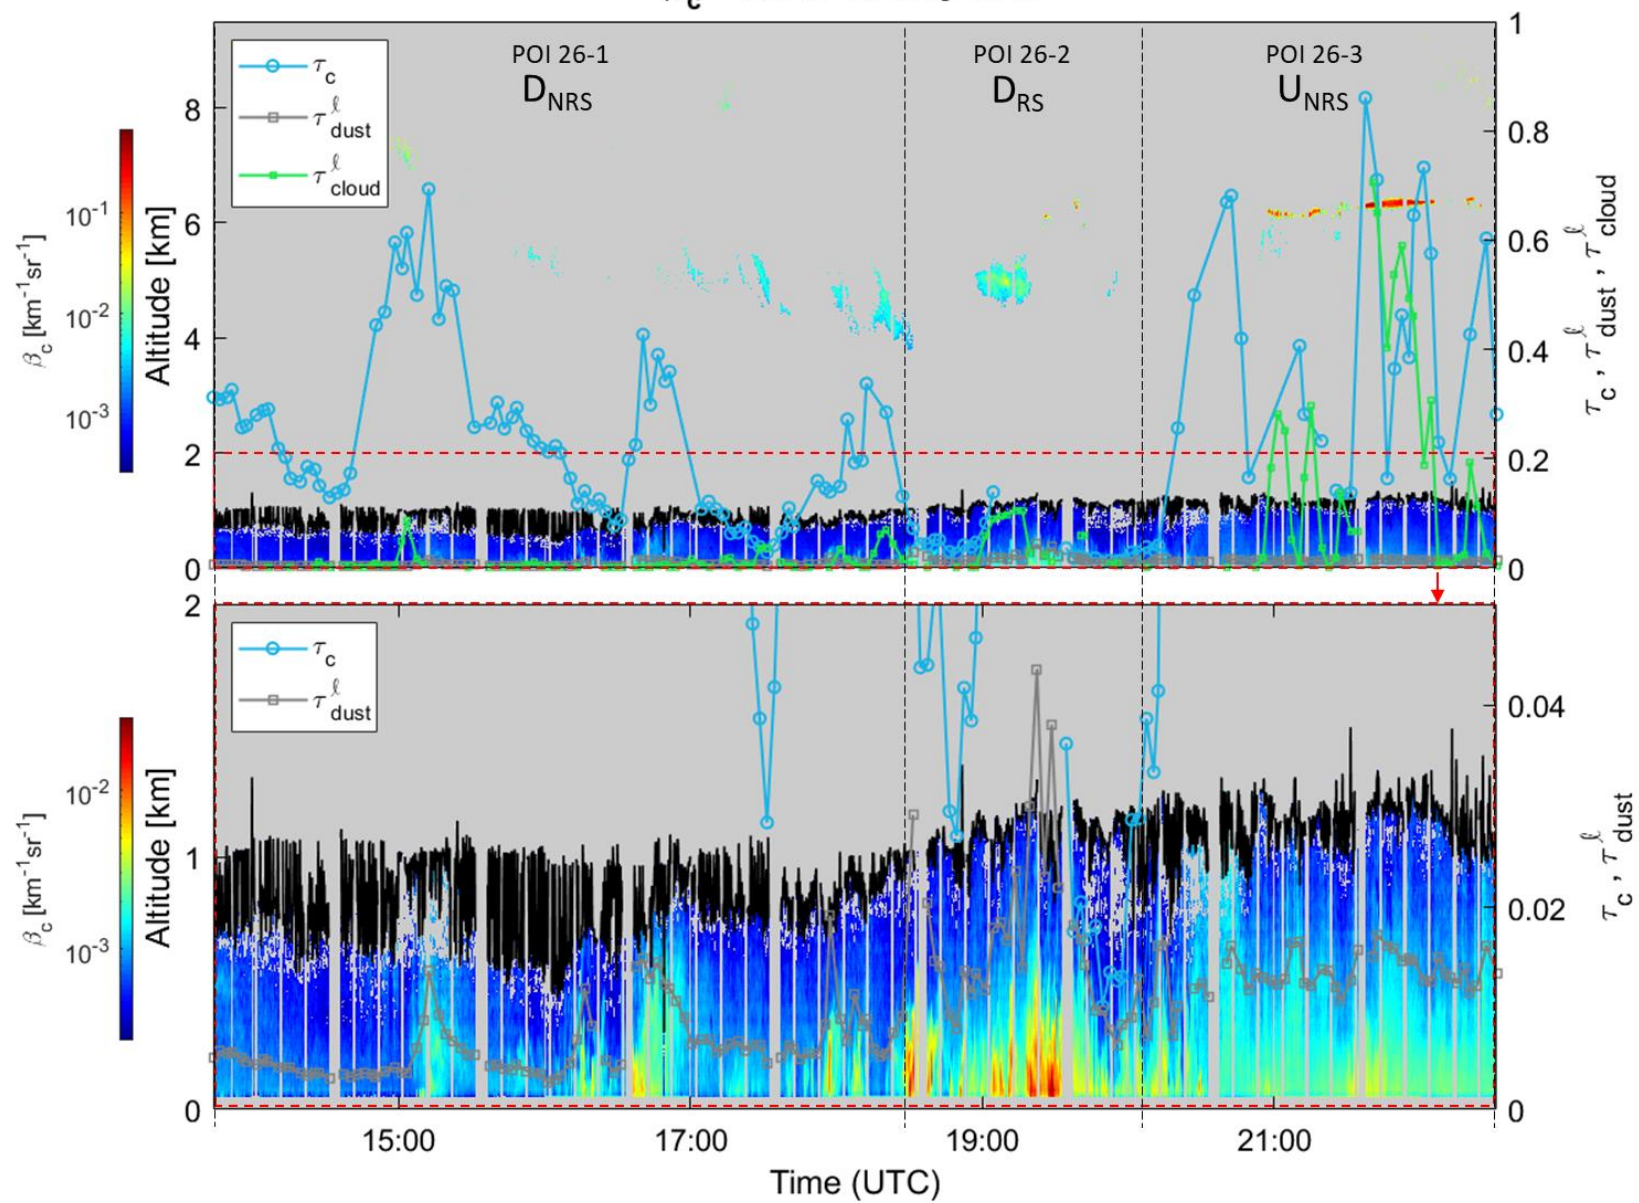

# $\beta_c$ - KLRs 27/28-May-2019

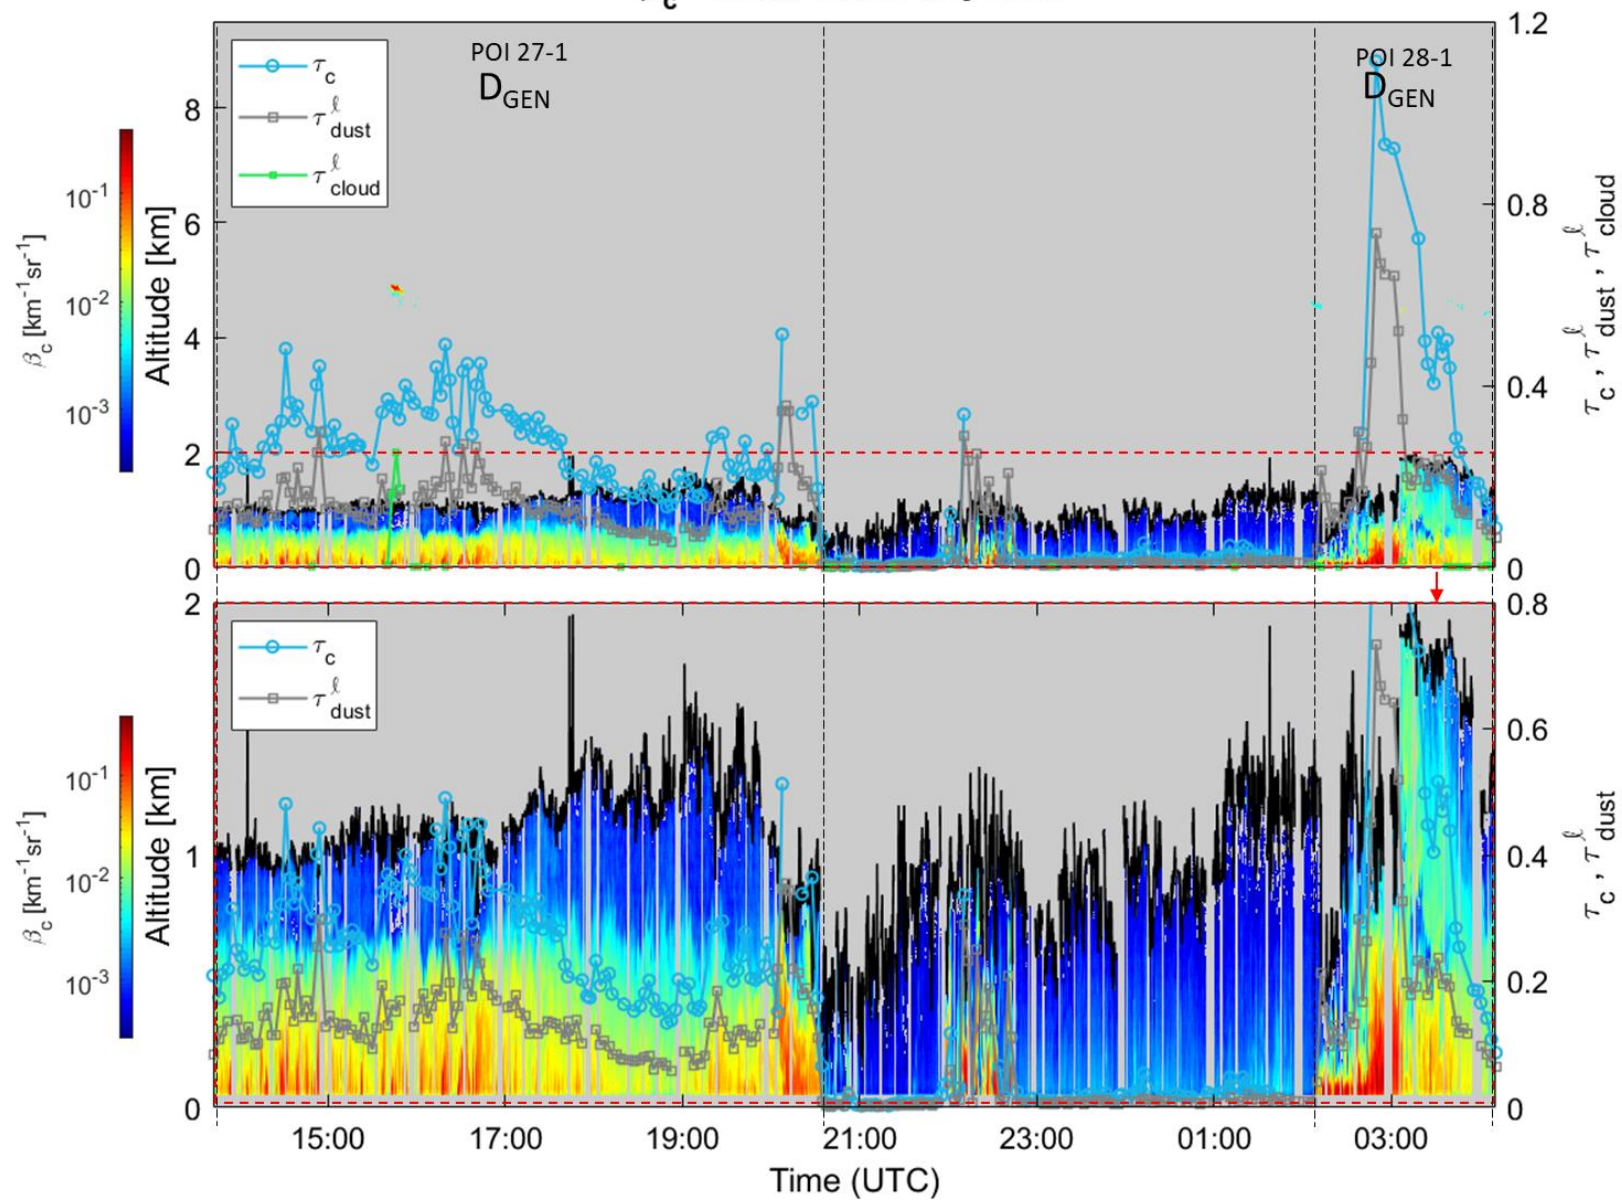

# $\beta_c$ - KLRs 28/29-May-2019

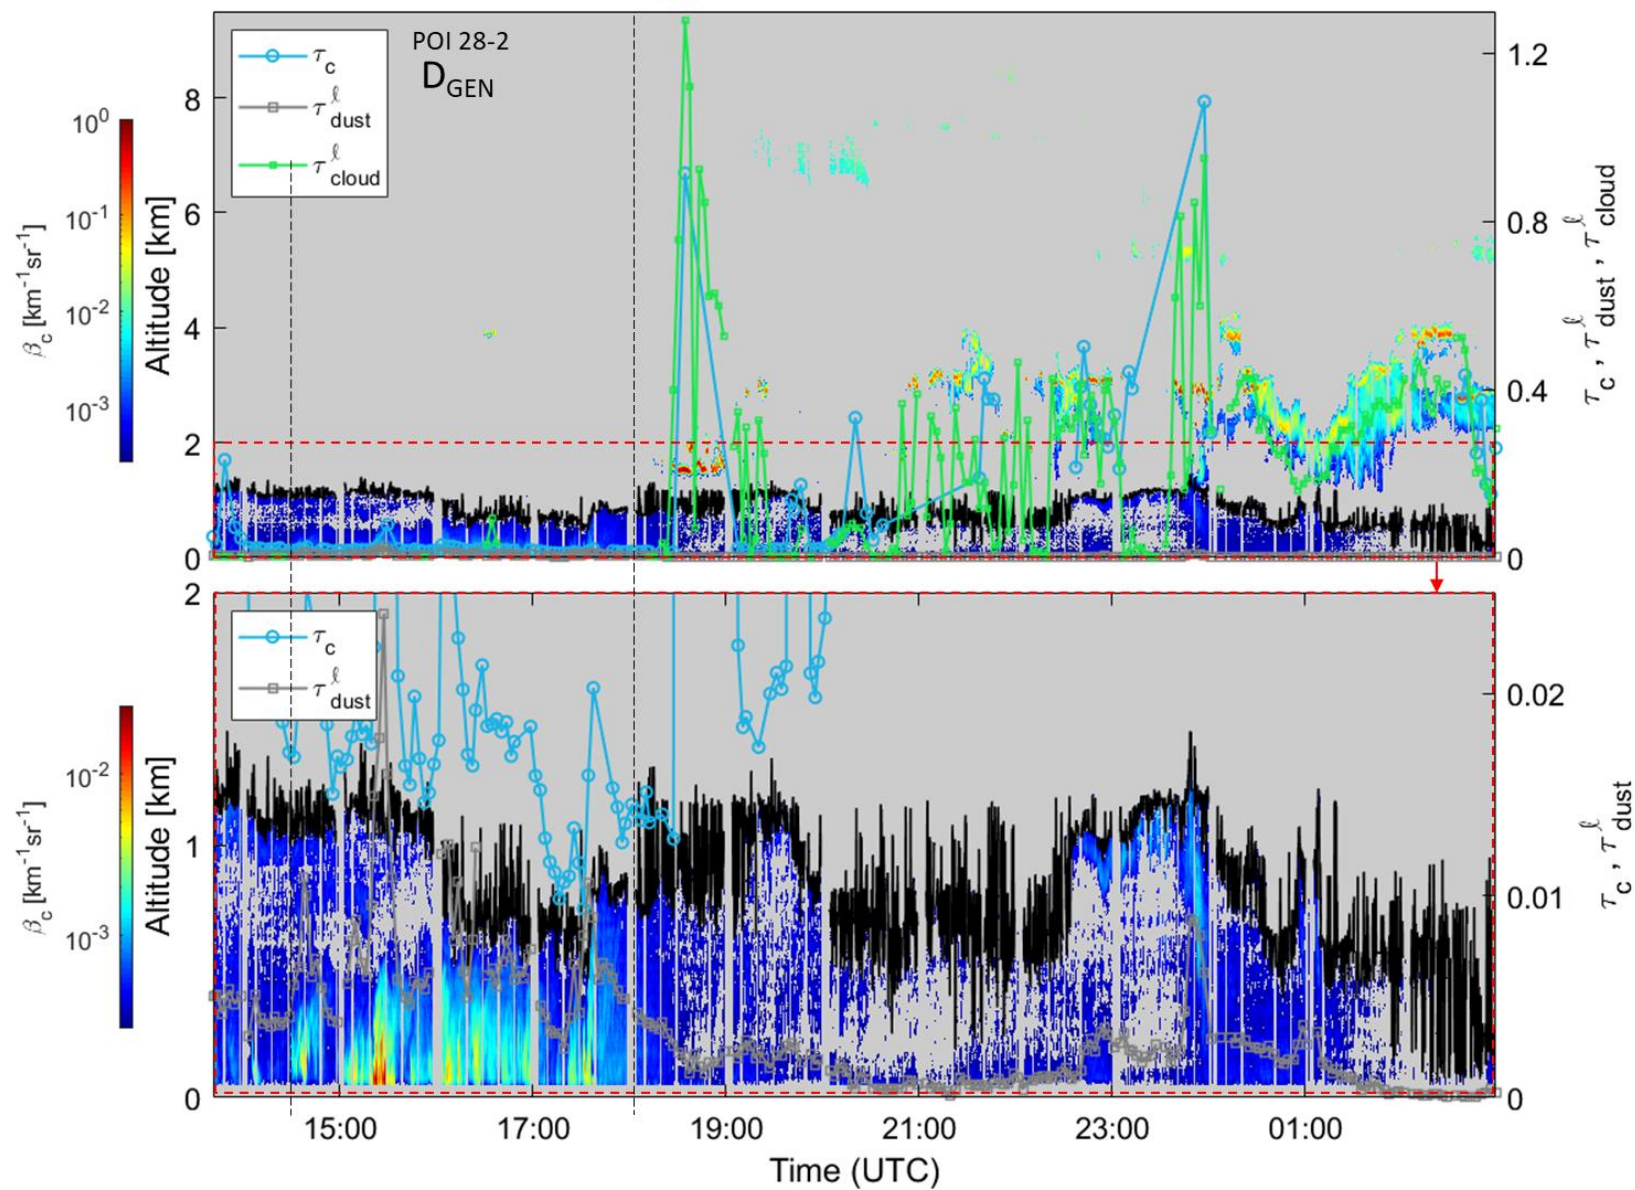

# $\beta_c$ - KLRs 29/30-May-2019

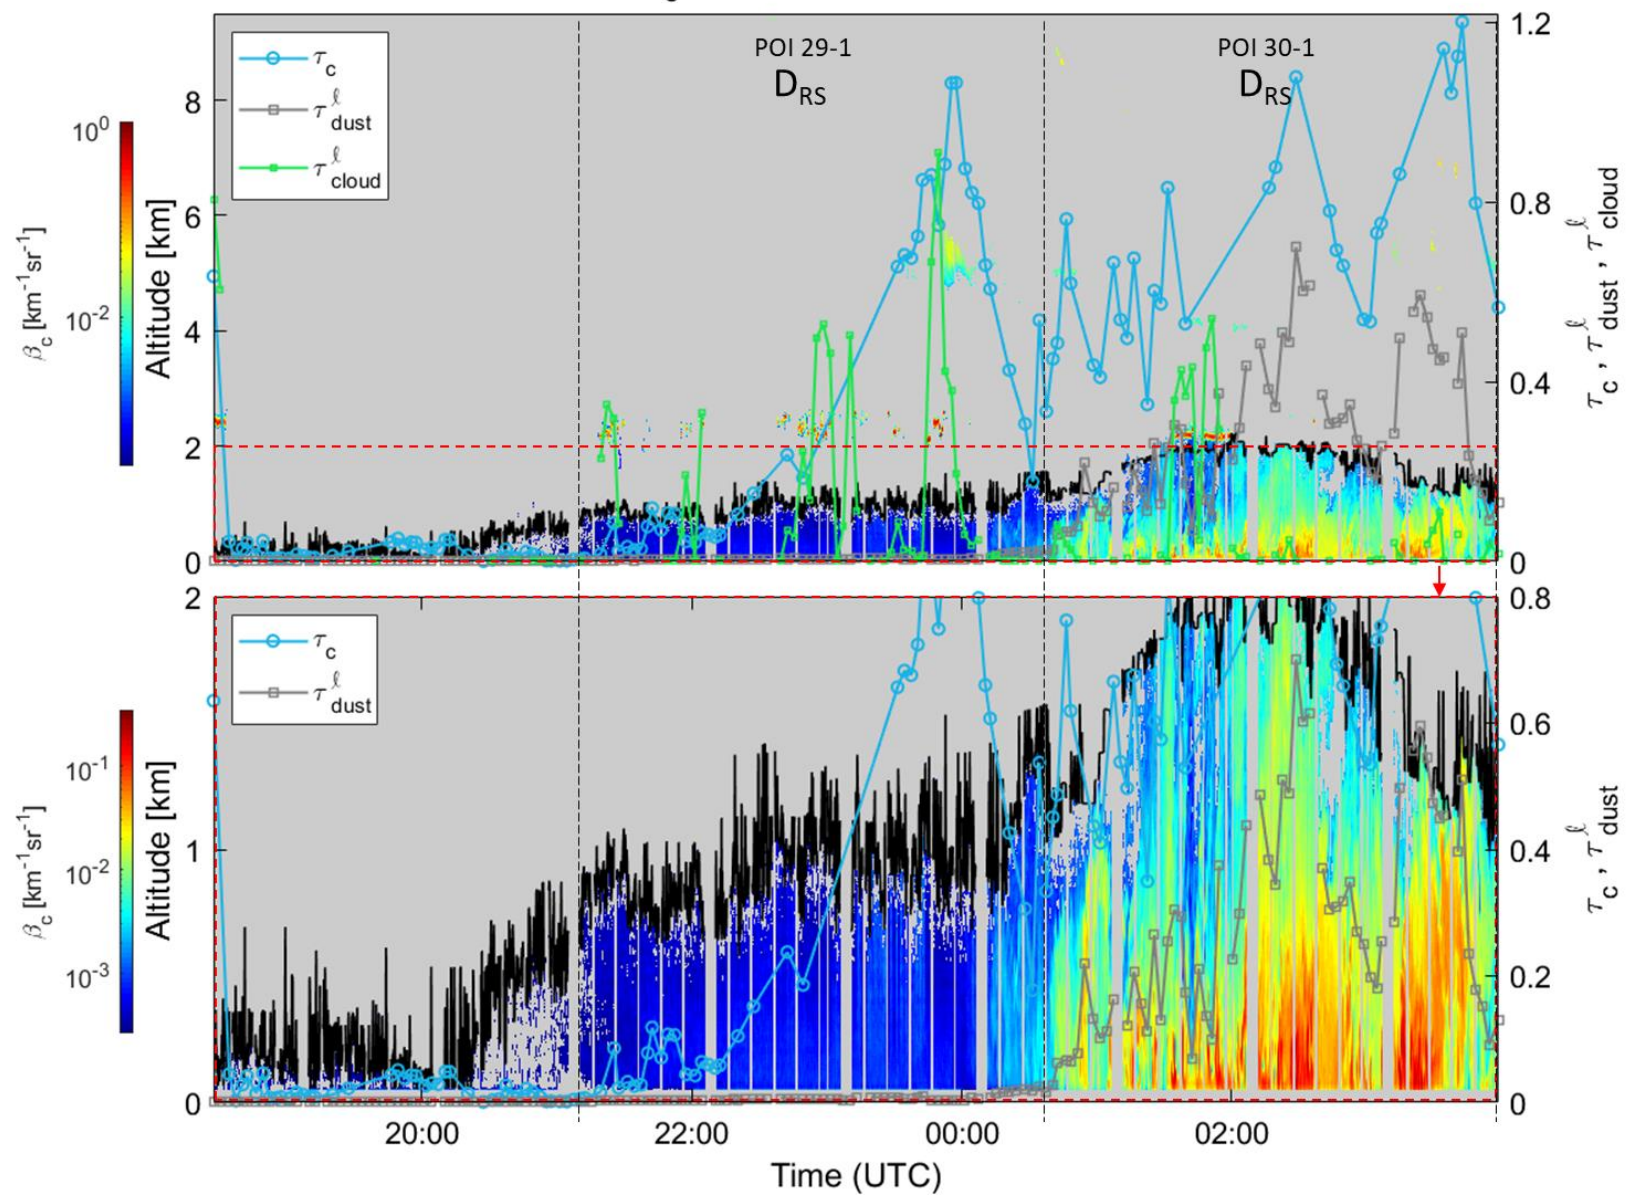

# $\beta_c$ - KLRS 30-May-2019

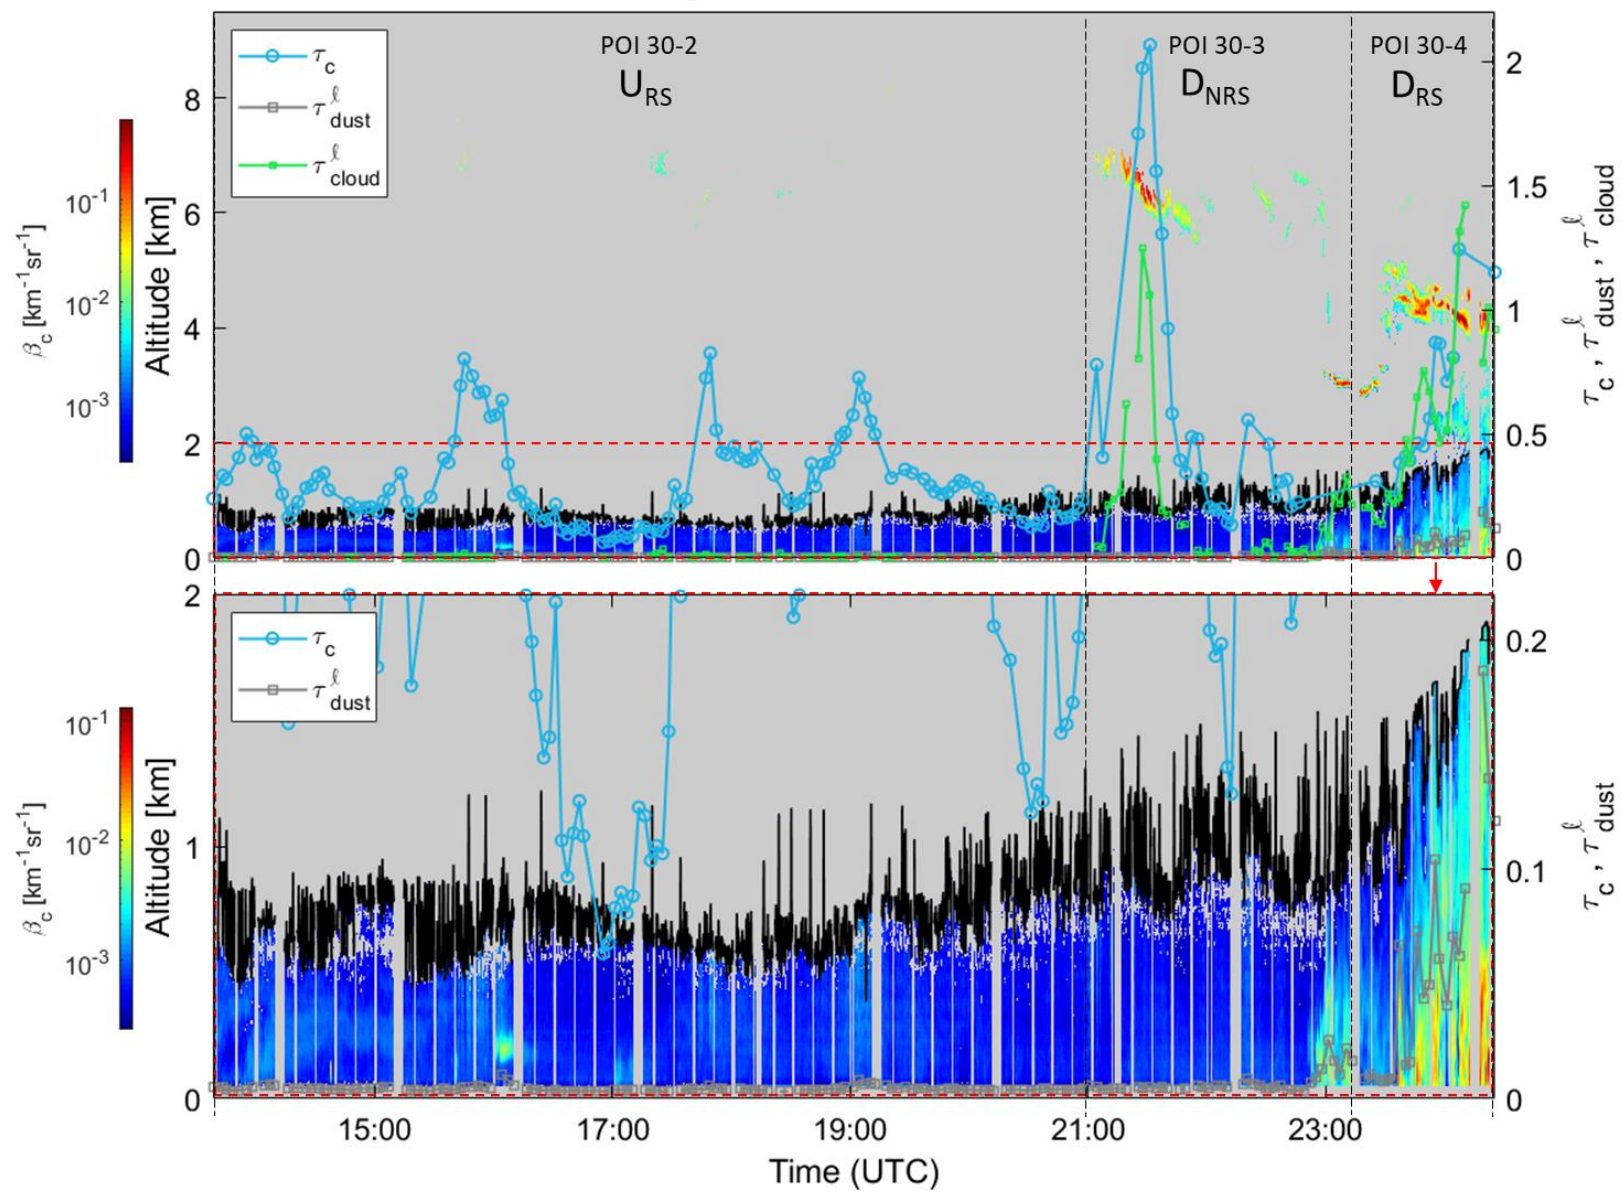

# $\beta_c$ - KLRS 31-May/1-June-2019

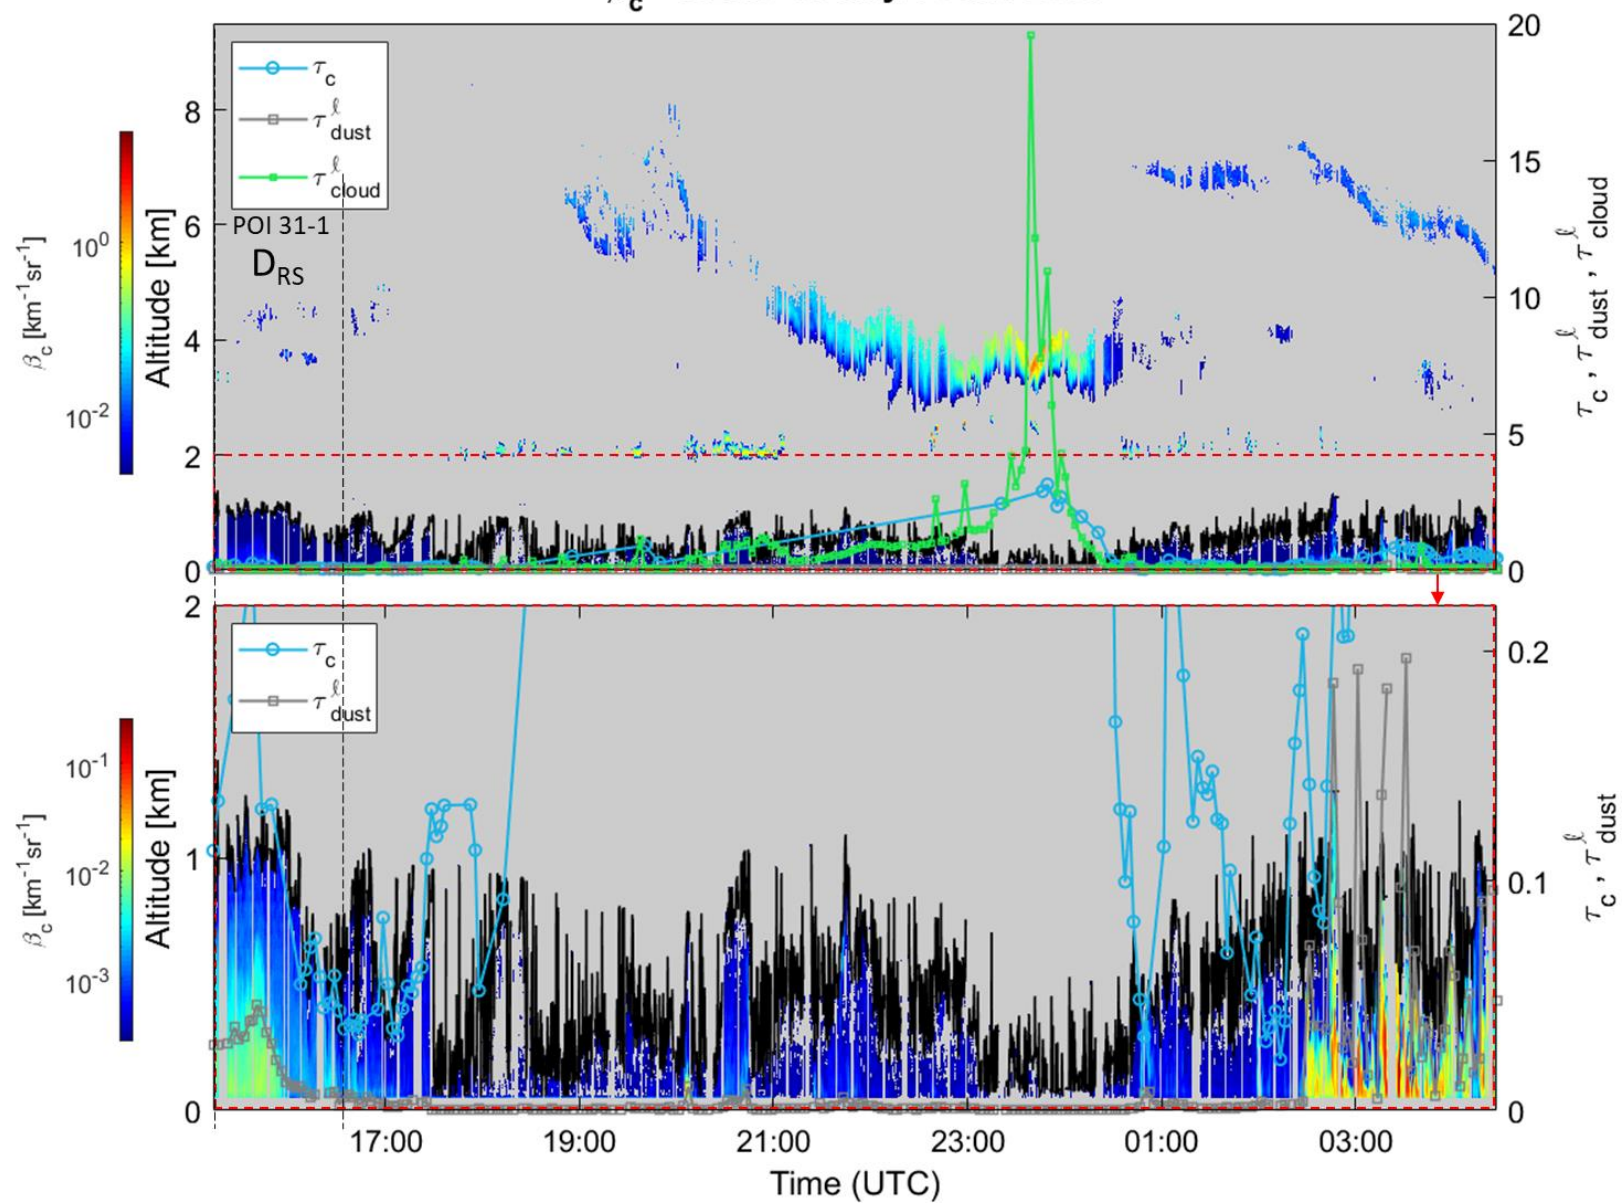

Supplement: Supplementary file 2 [file amt-16-4115-2023-supplement.zip]
