# Supplementary material for: Detection and analysis of Lhù'ààn Mân' (Kluane Lake) dust plumes using passive and active ground-based remote sensing supported by physical surface measurements
Source: Copernicus journal article supplement (doi:10.5194/amt-16-4115-2023), 2023-09-12

**S7 Daily PSD retrieved from Optical Particle Counter (OPC) and Optical Particle Sizer (OPS) measurements at the two DV and KLRS sites, respectively, 1, 7, 8, and 9 May 2019**

The PSDs below show all measurements on the days that correspond to the large multi-colored events of Table 1 and Fig. 9 (the days are referenced to 00:00 to 24:00 Pacific Daylight Time<sup>1</sup>). Each slide consists of 3 columns of total particle-volume size distributions (linear and log scale at the top and bottom respectively) on a given day. Those columns show the distributions for the DV (3 m elevation) OPC, the DV (6 m elevation) OPC and the KLRS OPS (the latter being within 50 m of the CIMEL). Empty columns indicate a lack of OPC measurements on any given day.

---

<sup>1</sup> UTC – 7h

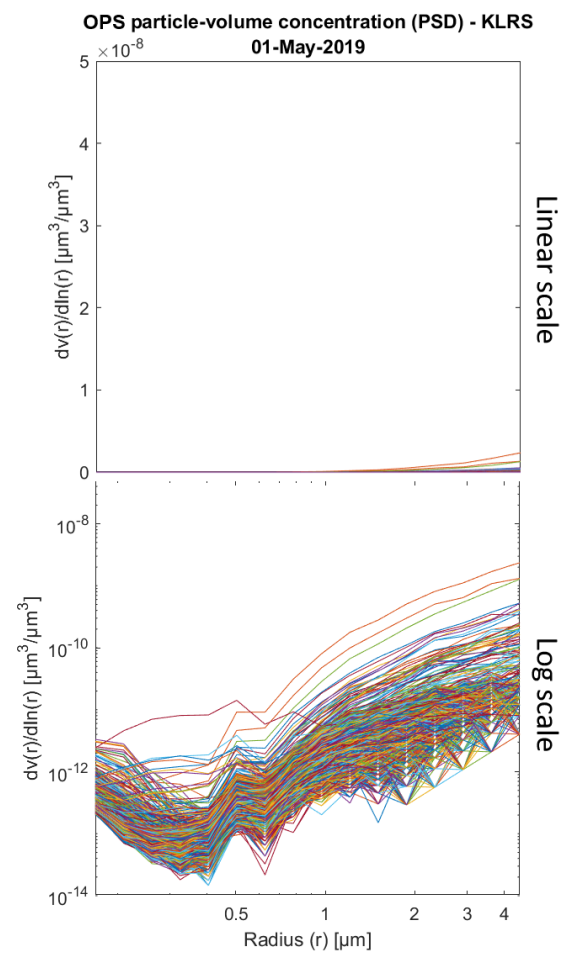

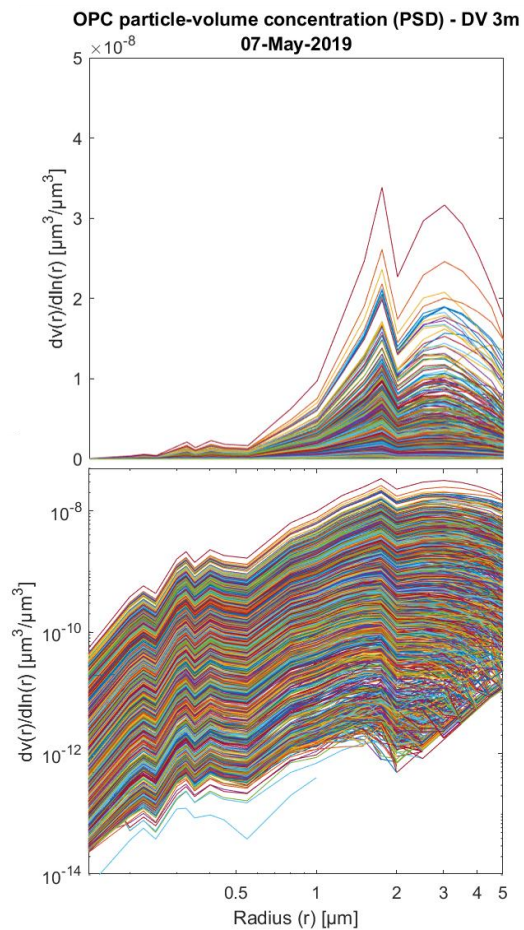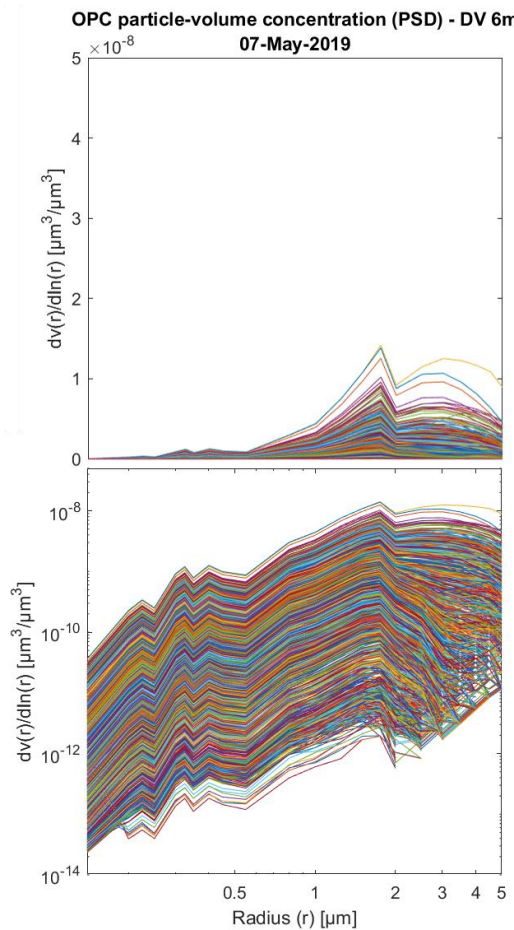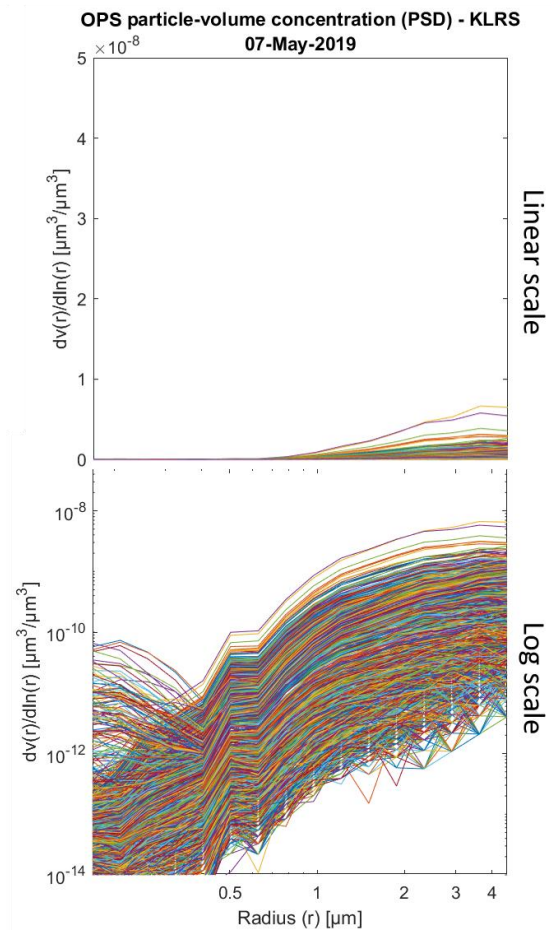

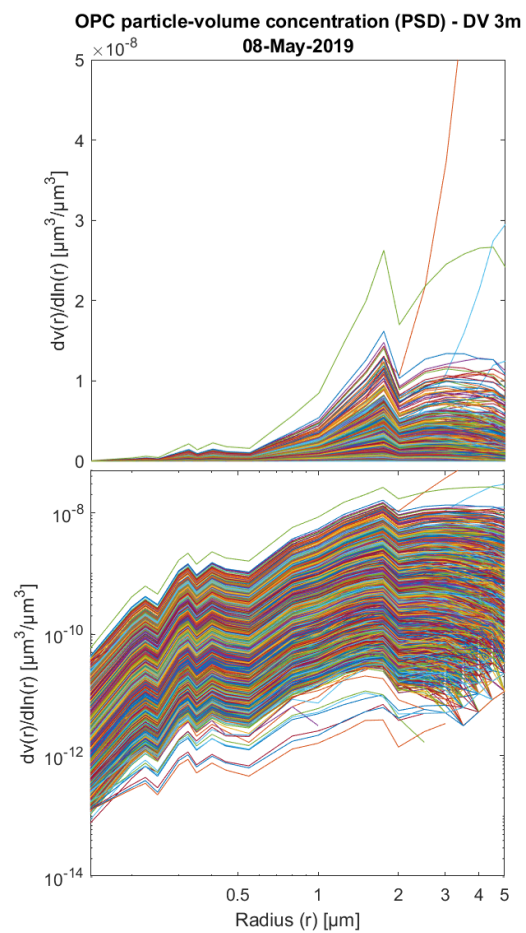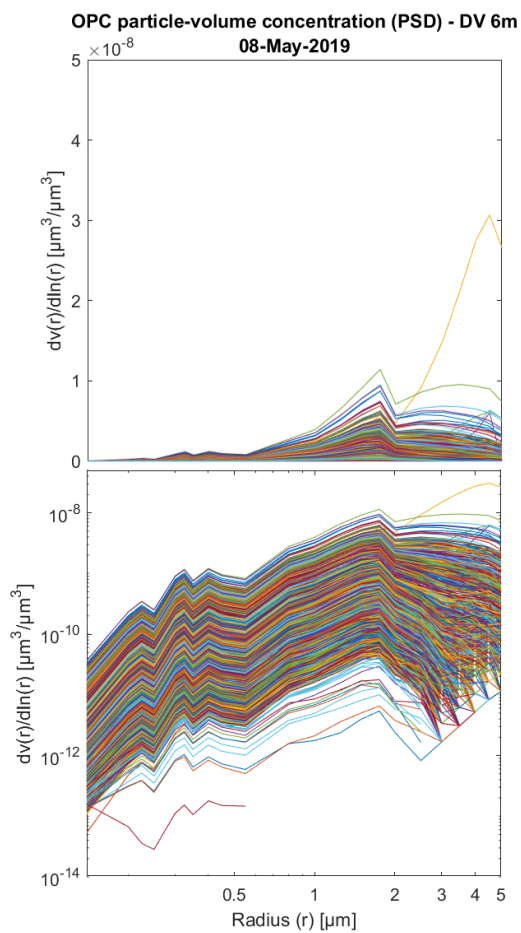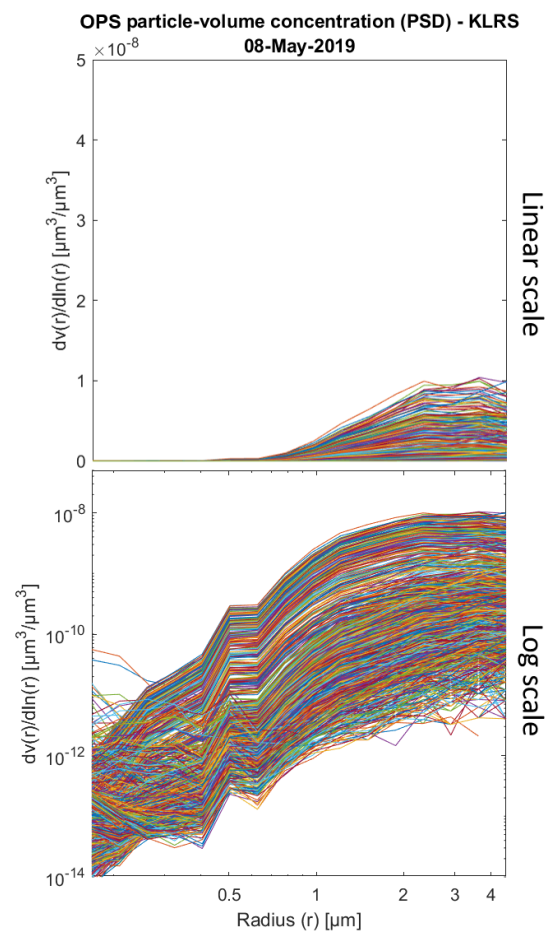

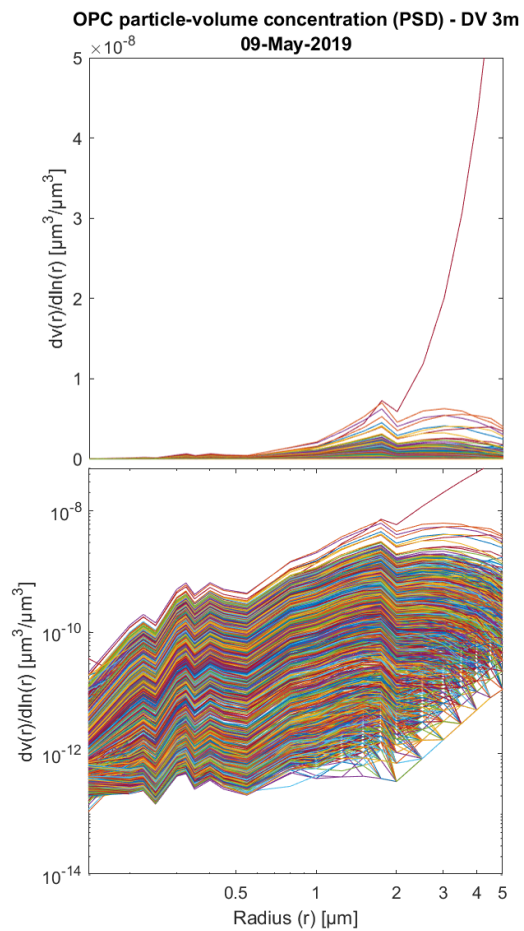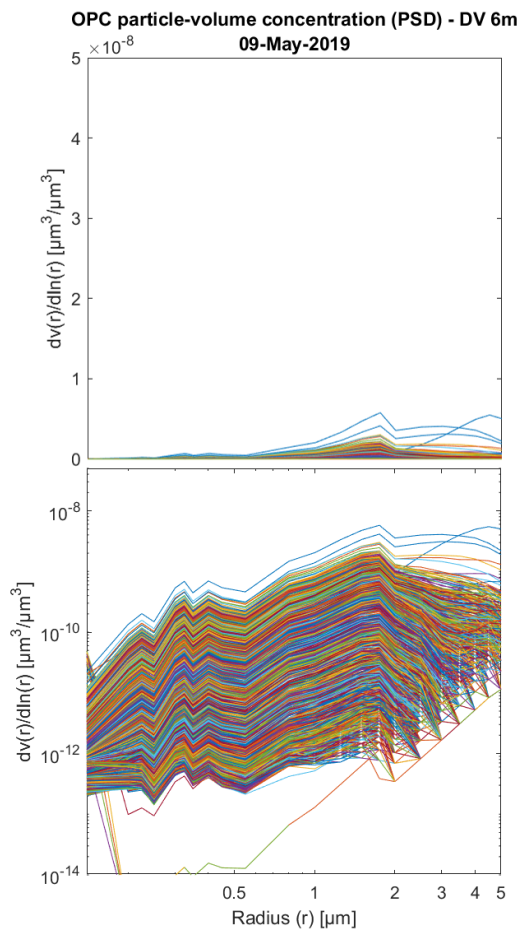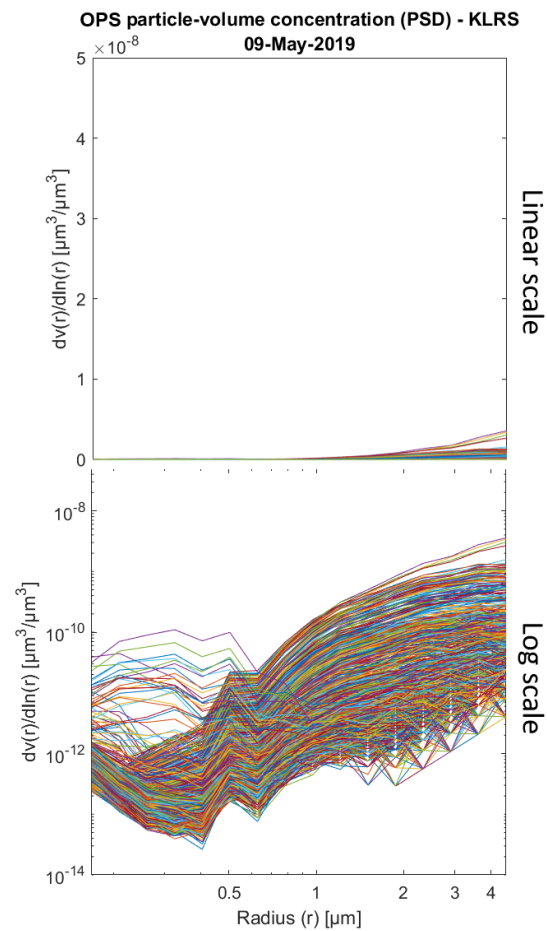

Supplement: Supplementary file 3 [file amt-16-4115-2023-supplement.zip]
