# Supplementary material for: Detection and analysis of Lhù'ààn Mân' (Kluane Lake) dust plumes using passive and active ground-based remote sensing supported by physical surface measurements
Source: Copernicus journal article supplement (doi:10.5194/amt-16-4115-2023), 2023-09-12
Supplement: Supplementary file 4 [file amt-16-4115-2023-supplement.zip]

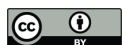

## *Supplement of*

# **Detection and analysis of Lhù'ààn Mân' (Kluane Lake) dust plumes using passive and active ground-based remote sensing supported by physical surface measurements**

**Seyed Ali Sayedain et al.**

*Correspondence to:* Seyed Ali Sayedain ([seyed.ali.sayedain@usherbrooke.ca](mailto:seyed.ali.sayedain@usherbrooke.ca))

- [amt-16-4115-2023-supplement-title-page.pdf](#)
- Supplementary material
  - [Supplementary\\_Material\\_S1-S5.pdf](#)
  - [Supplementary\\_Material\\_S6.pdf](#)
  - [Supplementary\\_Material\\_S7.pdf](#)

The copyright of individual parts of the supplement might differ from the article licence.
